# Supplementary material for: The Effects of a Calcium-Rich Pre-Exercise Meal on Biomarkers of Calcium Homeostasis in Competitive Female Cyclists: A Randomised Crossover Trial
Source: PLoS One. 2015 May 13;10(5):e0123302. doi: 10.1371/journal.pone.0123302 (PMC4430171; doi:10.1371/journal.pone.0123302)
Supplement: S1 Table — (XLSX) [file pone.0123302.s006.xlsx]

## Sheet: S1_Table
Subject	Trial	Meal Condition	Recovery Condition	Time Point	Age (y)	Height (cm)	Fasted Mass (kg)	Nonfasted Mass (kg)	Sum7 Skinfolds (mm)	DXA Fat (%)	DXA Fat (g)	DXA Lean (g)	DXA BMC (g)	Femur BMD (g/cm^2)	Femur BMD T score	Femur BMD Z score	Lumbar BMD (g/cm^2)	Lumbar BMD T score	Lumbar BMD Z score	Peak 30 sec VO2 (ml)	peak 60 sec VO2 (ml)	Peak 30 sec VO2 (L)	Peak 60 sec VO2 (L)	RER	Peak HR (bpm)	Step Test Finish (Min)	Step Test Finish (Sec)	Step Test Duration (Sec)	MAP (watts)	MAP (w/kg)	VitD	PTH_baseline	Calcium	Phospoate	Magnesium	Alk Phosphate	Creatinine	GFR	TSH	Day 2 E2	Day 1 Progesterone	Contraceptive type	Menstrual Cycle Phase	Pre Load (watts)	Pre Load work (kJ)	10minTT(watts)	Total Work Done (kJ)	Est EE (kJ)	Gut Comfort
1	1	LowCa	Con	Pre_trial	29.6	173.4	62	62.7	52	11.5	6906	53138	2612	1.079	0.2	0.4	1.117	-0.7	-0.6	28.73	57.43	1.8	3.6	1.1	206	23	30	1410	296	4.72	74	2.4	2.5	1.6	0.93	50	80	86	1.37	85	1	5	5	177	849.6	211	976.2	5138	2
1	1	LowCa	Con	Post_Meal	29.6	173.4	62	62.7	52	11.5	6906	53138	2612	1.079	0.2	0.4	1.117	-0.7	-0.6	28.73	57.43	1.8	3.6	1.1	206	23	30	1410	296	4.72	74	2.4	2.5	1.6	0.93	50	80	86	1.37	85	1	5	5	177	849.6	211	976.2	5138	3
1	1	LowCa	Con	Pre_Ex	29.6	173.4	62	62.7	52	11.5	6906	53138	2612	1.079	0.2	0.4	1.117	-0.7	-0.6	28.73	57.43	1.8	3.6	1.1	206	23	30	1410	296	4.72	74	2.4	2.5	1.6	0.93	50	80	86	1.37	85	1	5	5	177	849.6	211	976.2	5138	2
1	1	LowCa	Con	Ex	29.6	173.4	62	62.7	52	11.5	6906	53138	2612	1.079	0.2	0.4	1.117	-0.7	-0.6	28.73	57.43	1.8	3.6	1.1	206	23	30	1410	296	4.72	74	2.4	2.5	1.6	0.93	50	80	86	1.37	85	1	5	5	177	849.6	211	976.2	5138	3
1	1	LowCa	Con	Post_ex	29.6	173.4	62	62.7	52	11.5	6906	53138	2612	1.079	0.2	0.4	1.117	-0.7	-0.6	28.73	57.43	1.8	3.6	1.1	206	23	30	1410	296	4.72	74	2.4	2.5	1.6	0.93	50	80	86	1.37	85	1	5	5	177	849.6	211	976.2	5138	4
1	1	LowCa	Con	PostRE1	29.6	173.4	62	62.7	52	11.5	6906	53138	2612	1.079	0.2	0.4	1.117	-0.7	-0.6	28.73	57.43	1.8	3.6	1.1	206	23	30	1410	296	4.72	74	2.4	2.5	1.6	0.93	50	80	86	1.37	85	1	5	5	177	849.6	211	976.2	5138	3
1	1	LowCa	Con	PostRE2	29.6	173.4	62	62.7	52	11.5	6906	53138	2612	1.079	0.2	0.4	1.117	-0.7	-0.6	28.73	57.43	1.8	3.6	1.1	206	23	30	1410	296	4.72	74	2.4	2.5	1.6	0.93	50	80	86	1.37	85	1	5	5	177	849.6	211	976.2	5138	2
1	1	LowCa	Con	PostRE3	29.6	173.4	62	62.7	52	11.5	6906	53138	2612	1.079	0.2	0.4	1.117	-0.7	-0.6	28.73	57.43	1.8	3.6	1.1	206	23	30	1410	296	4.72	74	2.4	2.5	1.6	0.93	50	80	86	1.37	85	1	5	5	177	849.6	211	976.2	5138	2
1	2	Ca	CWI	Pre_trial	29.6	173.4	62	62.7	52	11.5	6906	53138	2612	1.079	0.2	0.4	1.117	-0.7	-0.6	28.73	57.43	1.8	3.6	1.1	206	23	30	1410	296	4.72	74	2.4	2.5	1.6	0.93	50	80	86	1.37	85	1	5	5	178	854.4	225	989.4	5207	3
1	2	Ca	CWI	Post_Meal	29.6	173.4	62	62.7	52	11.5	6906	53138	2612	1.079	0.2	0.4	1.117	-0.7	-0.6	28.73	57.43	1.8	3.6	1.1	206	23	30	1410	296	4.72	74	2.4	2.5	1.6	0.93	50	80	86	1.37	85	1	5	5	178	854.4	225	989.4	5207	3
1	2	Ca	CWI	Pre_Ex	29.6	173.4	62	62.7	52	11.5	6906	53138	2612	1.079	0.2	0.4	1.117	-0.7	-0.6	28.73	57.43	1.8	3.6	1.1	206	23	30	1410	296	4.72	74	2.4	2.5	1.6	0.93	50	80	86	1.37	85	1	5	5	178	854.4	225	989.4	5207	4
1	2	Ca	CWI	Ex	29.6	173.4	62	62.7	52	11.5	6906	53138	2612	1.079	0.2	0.4	1.117	-0.7	-0.6	28.73	57.43	1.8	3.6	1.1	206	23	30	1410	296	4.72	74	2.4	2.5	1.6	0.93	50	80	86	1.37	85	1	5	5	178	854.4	225	989.4	5207	2
1	2	Ca	CWI	Post_ex	29.6	173.4	62	62.7	52	11.5	6906	53138	2612	1.079	0.2	0.4	1.117	-0.7	-0.6	28.73	57.43	1.8	3.6	1.1	206	23	30	1410	296	4.72	74	2.4	2.5	1.6	0.93	50	80	86	1.37	85	1	5	5	178	854.4	225	989.4	5207	2
1	2	Ca	CWI	PostRE1	29.6	173.4	62	62.7	52	11.5	6906	53138	2612	1.079	0.2	0.4	1.117	-0.7	-0.6	28.73	57.43	1.8	3.6	1.1	206	23	30	1410	296	4.72	74	2.4	2.5	1.6	0.93	50	80	86	1.37	85	1	5	5	178	854.4	225	989.4	5207	2
1	2	Ca	CWI	PostRE2	29.6	173.4	62	62.7	52	11.5	6906	53138	2612	1.079	0.2	0.4	1.117	-0.7	-0.6	28.73	57.43	1.8	3.6	1.1	206	23	30	1410	296	4.72	74	2.4	2.5	1.6	0.93	50	80	86	1.37	85	1	5	5	178	854.4	225	989.4	5207	2
1	2	Ca	CWI	PostRE3	29.6	173.4	62	62.7	52	11.5	6906	53138	2612	1.079	0.2	0.4	1.117	-0.7	-0.6	28.73	57.43	1.8	3.6	1.1	206	23	30	1410	296	4.72	74	2.4	2.5	1.6	0.93	50	80	86	1.37	85	1	5	5	178	854.4	225	989.4	5207	2
2	1	LowCa	CWI	Pre_trial	29.8	169.9	61.5	62.1	79.3	20.4	12119	47193	2440	0.947	-0.8	-0.6	1.162	-0.3	-0.2	27.89	55.71	1.73	3.46	1.1	197	22	0	1320	283	4.56	58	4	2.5	1.2	0.96	59	89	76	1.51	85	1	1	1	170	816	221	948.6	4993	1
2	1	LowCa	CWI	Post_Meal	29.8	169.9	61.5	62.1	79.3	20.4	12119	47193	2440	0.947	-0.8	-0.6	1.162	-0.3	-0.2	27.89	55.71	1.73	3.46	1.1	197	22	0	1320	283	4.56	58	4	2.5	1.2	0.96	59	89	76	1.51	85	1	1	1	170	816	221	948.6	4993	2
2	1	LowCa	CWI	Pre_Ex	29.8	169.9	61.5	62.1	79.3	20.4	12119	47193	2440	0.947	-0.8	-0.6	1.162	-0.3	-0.2	27.89	55.71	1.73	3.46	1.1	197	22	0	1320	283	4.56	58	4	2.5	1.2	0.96	59	89	76	1.51	85	1	1	1	170	816	221	948.6	4993	2
2	1	LowCa	CWI	Ex	29.8	169.9	61.5	62.1	79.3	20.4	12119	47193	2440	0.947	-0.8	-0.6	1.162	-0.3	-0.2	27.89	55.71	1.73	3.46	1.1	197	22	0	1320	283	4.56	58	4	2.5	1.2	0.96	59	89	76	1.51	85	1	1	1	170	816	221	948.6	4993	1
2	1	LowCa	CWI	Post_ex	29.8	169.9	61.5	62.1	79.3	20.4	12119	47193	2440	0.947	-0.8	-0.6	1.162	-0.3	-0.2	27.89	55.71	1.73	3.46	1.1	197	22	0	1320	283	4.56	58	4	2.5	1.2	0.96	59	89	76	1.51	85	1	1	1	170	816	221	948.6	4993	1
2	1	LowCa	CWI	PostRE1	29.8	169.9	61.5	62.1	79.3	20.4	12119	47193	2440	0.947	-0.8	-0.6	1.162	-0.3	-0.2	27.89	55.71	1.73	3.46	1.1	197	22	0	1320	283	4.56	58	4	2.5	1.2	0.96	59	89	76	1.51	85	1	1	1	170	816	221	948.6	4993
2	1	LowCa	CWI	PostRE2	29.8	169.9	61.5	62.1	79.3	20.4	12119	47193	2440	0.947	-0.8	-0.6	1.162	-0.3	-0.2	27.89	55.71	1.73	3.46	1.1	197	22	0	1320	283	4.56	58	4	2.5	1.2	0.96	59	89	76	1.51	85	1	1	1	170	816	221	948.6	4993
2	1	LowCa	CWI	PostRE3	29.8	169.9	61.5	62.1	79.3	20.4	12119	47193	2440	0.947	-0.8	-0.6	1.162	-0.3	-0.2	27.89	55.71	1.73	3.46	1.1	197	22	0	1320	283	4.56	58	4	2.5	1.2	0.96	59	89	76	1.51	85	1	1	1	170	816	221	948.6	4993
2	2	Ca	Con	Pre_trial	29.8	169.9	61.5	62.1	79.3	20.4	12119	47193	2440	0.947	-0.8	-0.6	1.162	-0.3	-0.2	27.89	55.71	1.73	3.46	1.1	197	22	0	1320	283	4.56	58	4	2.5	1.2	0.96	59	89	76	1.51	85	1	1	1	172	825.6	225	960.6	5056	1
2	2	Ca	Con	Post_Meal	29.8	169.9	61.5	62.1	79.3	20.4	12119	47193	2440	0.947	-0.8	-0.6	1.162	-0.3	-0.2	27.89	55.71	1.73	3.46	1.1	197	22	0	1320	283	4.56	58	4	2.5	1.2	0.96	59	89	76	1.51	85	1	1	1	172	825.6	225	960.6	5056	3
2	2	Ca	Con	Pre_Ex	29.8	169.9	61.5	62.1	79.3	20.4	12119	47193	2440	0.947	-0.8	-0.6	1.162	-0.3	-0.2	27.89	55.71	1.73	3.46	1.1	197	22	0	1320	283	4.56	58	4	2.5	1.2	0.96	59	89	76	1.51	85	1	1	1	172	825.6	225	960.6	5056	2
2	2	Ca	Con	Ex	29.8	169.9	61.5	62.1	79.3	20.4	12119	47193	2440	0.947	-0.8	-0.6	1.162	-0.3	-0.2	27.89	55.71	1.73	3.46	1.1	197	22	0	1320	283	4.56	58	4	2.5	1.2	0.96	59	89	76	1.51	85	1	1	1	172	825.6	225	960.6	5056	2
2	2	Ca	Con	Post_ex	29.8	169.9	61.5	62.1	79.3	20.4	12119	47193	2440	0.947	-0.8	-0.6	1.162	-0.3	-0.2	27.89	55.71	1.73	3.46	1.1	197	22	0	1320	283	4.56	58	4	2.5	1.2	0.96	59	89	76	1.51	85	1	1	1	172	825.6	225	960.6	5056	3
2	2	Ca	Con	PostRE1	29.8	169.9	61.5	62.1	79.3	20.4	12119	47193	2440	0.947	-0.8	-0.6	1.162	-0.3	-0.2	27.89	55.71	1.73	3.46	1.1	197	22	0	1320	283	4.56	58	4	2.5	1.2	0.96	59	89	76	1.51	85	1	1	1	172	825.6	225	960.6	5056	2
2	2	Ca	Con	PostRE2	29.8	169.9	61.5	62.1	79.3	20.4	12119	47193	2440	0.947	-0.8	-0.6	1.162	-0.3	-0.2	27.89	55.71	1.73	3.46	1.1	197	22	0	1320	283	4.56	58	4	2.5	1.2	0.96	59	89	76	1.51	85	1	1	1	172	825.6	225	960.6	5056	1
2	2	Ca	Con	PostRE3	29.8	169.9	61.5	62.1	79.3	20.4	12119	47193	2440	0.947	-0.8	-0.6	1.162	-0.3	-0.2	27.89	55.71	1.73	3.46	1.1	197	22	0	1320	283	4.56	58	4	2.5	1.2	0.96	59	89	76	1.51	85	1	1	1	172	825.6	225	960.6	5056	1
3	1	Ca	Con	Pre_trial	20.9	165.4	59.85	60.78	110.2	31.6	18231	39418	2390	0.999	-0.4	-0.2	1.031	-1.3	-1.2	25.82	50.96	1.61	3.1	1.02	176	18	0	1080	250	4.11	123	2.2	2.56	1.23	0.81	53	70	90	1.3	85	2.2	3	5	151	724.8	210	850.8	4478	1
3	1	Ca	Con	Post_Meal	20.9	165.4	59.85	60.78	110.2	31.6	18231	39418	2390	0.999	-0.4	-0.2	1.031	-1.3	-1.2	25.82	50.96	1.61	3.1	1.02	176	18	0	1080	250	4.11	123	2.2	2.56	1.23	0.81	53	70	90	1.3	85	2.2	3	5	151	724.8	210	850.8	4478	4
3	1	Ca	Con	Pre_Ex	20.9	165.4	59.85	60.78	110.2	31.6	18231	39418	2390	0.999	-0.4	-0.2	1.031	-1.3	-1.2	25.82	50.96	1.61	3.1	1.02	176	18	0	1080	250	4.11	123	2.2	2.56	1.23	0.81	53	70	90	1.3	85	2.2	3	5	151	724.8	210	850.8	4478	3
3	1	Ca	Con	Ex	20.9	165.4	59.85	60.78	110.2	31.6	18231	39418	2390	0.999	-0.4	-0.2	1.031	-1.3	-1.2	25.82	50.96	1.61	3.1	1.02	176	18	0	1080	250	4.11	123	2.2	2.56	1.23	0.81	53	70	90	1.3	85	2.2	3	5	151	724.8	210	850.8	4478	2
3	1	Ca	Con	Post_ex	20.9	165.4	59.85	60.78	110.2	31.6	18231	39418	2390	0.999	-0.4	-0.2	1.031	-1.3	-1.2	25.82	50.96	1.61	3.1	1.02	176	18	0	1080	250	4.11	123	2.2	2.56	1.23	0.81	53	70	90	1.3	85	2.2	3	5	151	724.8	210	850.8	4478	1
3	1	Ca	Con	PostRE1	20.9	165.4	59.85	60.78	110.2	31.6	18231	39418	2390	0.999	-0.4	-0.2	1.031	-1.3	-1.2	25.82	50.96	1.61	3.1	1.02	176	18	0	1080	250	4.11	123	2.2	2.56	1.23	0.81	53	70	90	1.3	85	2.2	3	5	151	724.8	210	850.8	4478	2
3	1	Ca	Con	PostRE2	20.9	165.4	59.85	60.78	110.2	31.6	18231	39418	2390	0.999	-0.4	-0.2	1.031	-1.3	-1.2	25.82	50.96	1.61	3.1	1.02	176	18	0	1080	250	4.11	123	2.2	2.56	1.23	0.81	53	70	90	1.3	85	2.2	3	5	151	724.8	210	850.8	4478	2
3	1	Ca	Con	PostRE3	20.9	165.4	59.85	60.78	110.2	31.6	18231	39418	2390	0.999	-0.4	-0.2	1.031	-1.3	-1.2	25.82	50.96	1.61	3.1	1.02	176	18	0	1080	250	4.11	123	2.2	2.56	1.23	0.81	53	70	90	1.3	85	2.2	3	5	151	724.8	210	850.8	4478	1
3	2	LowCa	CWI	Pre_trial	20.9	165.4	59.85	60.78	110.2	31.6	18231	39418	2390	0.999	-0.4	-0.2	1.031	-1.3	-1.2	25.82	50.96	1.61	3.1	1.02	176	18	0	1080	250	4.11	123	2.2	2.56	1.23	0.81	53	70	90	1.3	85	2.2	3	5	151	724.8	223	858.6	4519	2
3	2	LowCa	CWI	Post_Meal	20.9	165.4	59.85	60.78	110.2	31.6	18231	39418	2390	0.999	-0.4	-0.2	1.031	-1.3	-1.2	25.82	50.96	1.61	3.1	1.02	176	18	0	1080	250	4.11	123	2.2	2.56	1.23	0.81	53	70	90	1.3	85	2.2	3	5	151	724.8	223	858.6	4519	4
3	2	LowCa	CWI	Pre_Ex	20.9	165.4	59.85	60.78	110.2	31.6	18231	39418	2390	0.999	-0.4	-0.2	1.031	-1.3	-1.2	25.82	50.96	1.61	3.1	1.02	176	18	0	1080	250	4.11	123	2.2	2.56	1.23	0.81	53	70	90	1.3	85	2.2	3	5	151	724.8	223	858.6	4519	2
3	2	LowCa	CWI	Ex	20.9	165.4	59.85	60.78	110.2	31.6	18231	39418	2390	0.999	-0.4	-0.2	1.031	-1.3	-1.2	25.82	50.96	1.61	3.1	1.02	176	18	0	1080	250	4.11	123	2.2	2.56	1.23	0.81	53	70	90	1.3	85	2.2	3	5	151	724.8	223	858.6	4519	4
3	2	LowCa	CWI	Post_ex	20.9	165.4	59.85	60.78	110.2	31.6	18231	39418	2390	0.999	-0.4	-0.2	1.031	-1.3	-1.2	25.82	50.96	1.61	3.1	1.02	176	18	0	1080	250	4.11	123	2.2	2.56	1.23	0.81	53	70	90	1.3	85	2.2	3	5	151	724.8	223	858.6	4519	4
3	2	LowCa	CWI	PostRE1	20.9	165.4	59.85	60.78	110.2	31.6	18231	39418	2390	0.999	-0.4	-0.2	1.031	-1.3	-1.2	25.82	50.96	1.61	3.1	1.02	176	18	0	1080	250	4.11	123	2.2	2.56	1.23	0.81	53	70	90	1.3	85	2.2	3	5	151	724.8	223	858.6	4519	3
3	2	LowCa	CWI	PostRE2	20.9	165.4	59.85	60.78	110.2	31.6	18231	39418	2390	0.999	-0.4	-0.2	1.031	-1.3	-1.2	25.82	50.96	1.61	3.1	1.02	176	18	0	1080	250	4.11	123	2.2	2.56	1.23	0.81	53	70	90	1.3	85	2.2	3	5	151	724.8	223	858.6	4519	2
3	2	LowCa	CWI	PostRE3	20.9	165.4	59.85	60.78	110.2	31.6	18231	39418	2390	0.999	-0.4	-0.2	1.031	-1.3	-1.2	25.82	50.96	1.61	3.1	1.02	176	18	0	1080	250	4.11	123	2.2	2.56	1.23	0.81	53	70	90	1.3	85	2.2	3	5	151	724.8	223	858.6	4519	3
4	1	Ca	CWI	Pre_trial	30.6	177.7	61.65	61.33	74.6	14.7	8737	50640	2859	1.237	1.4	1.6	1.24	0.2	0.4	30.89	61.67	1.89	3.78	1.08	189	25	30	1530	313	5.1	86	4.4	2.55	1.21	0.96	53	74	90	3.03	85	1	3	5	188	902.4	257	1056.6	5561	3
4	1	Ca	CWI	Post_Meal	30.6	177.7	61.65	61.33	74.6	14.7	8737	50640	2859	1.237	1.4	1.6	1.24	0.2	0.4	30.89	61.67	1.89	3.78	1.08	189	25	30	1530	313	5.1	86	4.4	2.55	1.21	0.96	53	74	90	3.03	85	1	3	5	188	902.4	257	1056.6	5561	2
4	1	Ca	CWI	Pre_Ex	30.6	177.7	61.65	61.33	74.6	14.7	8737	50640	2859	1.237	1.4	1.6	1.24	0.2	0.4	30.89	61.67	1.89	3.78	1.08	189	25	30	1530	313	5.1	86	4.4	2.55	1.21	0.96	53	74	90	3.03	85	1	3	5	188	902.4	257	1056.6	5561	3
4	1	Ca	CWI	Ex	30.6	177.7	61.65	61.33	74.6	14.7	8737	50640	2859	1.237	1.4	1.6	1.24	0.2	0.4	30.89	61.67	1.89	3.78	1.08	189	25	30	1530	313	5.1	86	4.4	2.55	1.21	0.96	53	74	90	3.03	85	1	3	5	188	902.4	257	1056.6	5561	3
4	1	Ca	CWI	Post_ex	30.6	177.7	61.65	61.33	74.6	14.7	8737	50640	2859	1.237	1.4	1.6	1.24	0.2	0.4	30.89	61.67	1.89	3.78	1.08	189	25	30	1530	313	5.1	86	4.4	2.55	1.21	0.96	53	74	90	3.03	85	1	3	5	188	902.4	257	1056.6	5561	4
4	1	Ca	CWI	PostRE1	30.6	177.7	61.65	61.33	74.6	14.7	8737	50640	2859	1.237	1.4	1.6	1.24	0.2	0.4	30.89	61.67	1.89	3.78	1.08	189	25	30	1530	313	5.1	86	4.4	2.55	1.21	0.96	53	74	90	3.03	85	1	3	5	188	902.4	257	1056.6	5561	2
4	1	Ca	CWI	PostRE2	30.6	177.7	61.65	61.33	74.6	14.7	8737	50640	2859	1.237	1.4	1.6	1.24	0.2	0.4	30.89	61.67	1.89	3.78	1.08	189	25	30	1530	313	5.1	86	4.4	2.55	1.21	0.96	53	74	90	3.03	85	1	3	5	188	902.4	257	1056.6	5561	2
4	1	Ca	CWI	PostRE3	30.6	177.7	61.65	61.33	74.6	14.7	8737	50640	2859	1.237	1.4	1.6	1.24	0.2	0.4	30.89	61.67	1.89	3.78	1.08	189	25	30	1530	313	5.1	86	4.4	2.55	1.21	0.96	53	74	90	3.03	85	1	3	5	188	902.4	257	1056.6	5561	2
4	2	LowCa	Con	Pre_trial	30.6	177.7	61.65	61.33	74.6	14.7	8737	50640	2859	1.237	1.4	1.6	1.24	0.2	0.4	30.89	61.67	1.89	3.78	1.08	189	25	30	1530	313	5.1	86	4.4	2.55	1.21	0.96	53	74	90	3.03	85	1	3	5	188	902.4	265	1061.4	5586	3
4	2	LowCa	Con	Post_Meal	30.6	177.7	61.65	61.33	74.6	14.7	8737	50640	2859	1.237	1.4	1.6	1.24	0.2	0.4	30.89	61.67	1.89	3.78	1.08	189	25	30	1530	313	5.1	86	4.4	2.55	1.21	0.96	53	74	90	3.03	85	1	3	5	188	902.4	265	1061.4	5586	2
4	2	LowCa	Con	Pre_Ex	30.6	177.7	61.65	61.33	74.6	14.7	8737	50640	2859	1.237	1.4	1.6	1.24	0.2	0.4	30.89	61.67	1.89	3.78	1.08	189	25	30	1530	313	5.1	86	4.4	2.55	1.21	0.96	53	74	90	3.03	85	1	3	5	188	902.4	265	1061.4	5586	2
4	2	LowCa	Con	Ex	30.6	177.7	61.65	61.33	74.6	14.7	8737	50640	2859	1.237	1.4	1.6	1.24	0.2	0.4	30.89	61.67	1.89	3.78	1.08	189	25	30	1530	313	5.1	86	4.4	2.55	1.21	0.96	53	74	90	3.03	85	1	3	5	188	902.4	265	1061.4	5586	2
4	2	LowCa	Con	Post_ex	30.6	177.7	61.65	61.33	74.6	14.7	8737	50640	2859	1.237	1.4	1.6	1.24	0.2	0.4	30.89	61.67	1.89	3.78	1.08	189	25	30	1530	313	5.1	86	4.4	2.55	1.21	0.96	53	74	90	3.03	85	1	3	5	188	902.4	265	1061.4	5586	2
4	2	LowCa	Con	PostRE1	30.6	177.7	61.65	61.33	74.6	14.7	8737	50640	2859	1.237	1.4	1.6	1.24	0.2	0.4	30.89	61.67	1.89	3.78	1.08	189	25	30	1530	313	5.1	86	4.4	2.55	1.21	0.96	53	74	90	3.03	85	1	3	5	188	902.4	265	1061.4	5586	2
4	2	LowCa	Con	PostRE2	30.6	177.7	61.65	61.33	74.6	14.7	8737	50640	2859	1.237	1.4	1.6	1.24	0.2	0.4	30.89	61.67	1.89	3.78	1.08	189	25	30	1530	313	5.1	86	4.4	2.55	1.21	0.96	53	74	90	3.03	85	1	3	5	188	902.4	265	1061.4	5586	2
4	2	LowCa	Con	PostRE3	30.6	177.7	61.65	61.33	74.6	14.7	8737	50640	2859	1.237	1.4	1.6	1.24	0.2	0.4	30.89	61.67	1.89	3.78	1.08	189	25	30	1530	313	5.1	86	4.4	2.55	1.21	0.96	53	74	90	3.03	85	1	3	5	188	902.4	265	1061.4	5586	1
5	1	LowCa	Con	Pre_trial	28.1	156.4	56.66	57.15	76.9	18.1	9967	45030	2259	1.129	0.6	0.9	1.244	0.3	0.5	27.4	53.62	1.57	3.07	1.16?	192	17	5	1025	242	4.24	91	2.9	2.47	1.45	0.86	52	74	90	2.27	315	18	1	2	146	700.8	204	823.2	4333	1
5	1	LowCa	Con	Post_Meal	28.1	156.4	56.66	57.15	76.9	18.1	9967	45030	2259	1.129	0.6	0.9	1.244	0.3	0.5	27.4	53.62	1.57	3.07	1.16?	192	17	5	1025	242	4.24	91	2.9	2.47	1.45	0.86	52	74	90	2.27	315	18	1	2	146	700.8	204	823.2	4333	1
5	1	LowCa	Con	Pre_Ex	28.1	156.4	56.66	57.15	76.9	18.1	9967	45030	2259	1.129	0.6	0.9	1.244	0.3	0.5	27.4	53.62	1.57	3.07	1.16?	192	17	5	1025	242	4.24	91	2.9	2.47	1.45	0.86	52	74	90	2.27	315	18	1	2	146	700.8	204	823.2	4333	2
5	1	LowCa	Con	Ex	28.1	156.4	56.66	57.15	76.9	18.1	9967	45030	2259	1.129	0.6	0.9	1.244	0.3	0.5	27.4	53.62	1.57	3.07	1.16?	192	17	5	1025	242	4.24	91	2.9	2.47	1.45	0.86	52	74	90	2.27	315	18	1	2	146	700.8	204	823.2	4333	2
5	1	LowCa	Con	Post_ex	28.1	156.4	56.66	57.15	76.9	18.1	9967	45030	2259	1.129	0.6	0.9	1.244	0.3	0.5	27.4	53.62	1.57	3.07	1.16?	192	17	5	1025	242	4.24	91	2.9	2.47	1.45	0.86	52	74	90	2.27	315	18	1	2	146	700.8	204	823.2	4333	4
5	1	LowCa	Con	PostRE1	28.1	156.4	56.66	57.15	76.9	18.1	9967	45030	2259	1.129	0.6	0.9	1.244	0.3	0.5	27.4	53.62	1.57	3.07	1.16?	192	17	5	1025	242	4.24	91	2.9	2.47	1.45	0.86	52	74	90	2.27	315	18	1	2	146	700.8	204	823.2	4333	3
5	1	LowCa	Con	PostRE2	28.1	156.4	56.66	57.15	76.9	18.1	9967	45030	2259	1.129	0.6	0.9	1.244	0.3	0.5	27.4	53.62	1.57	3.07	1.16?	192	17	5	1025	242	4.24	91	2.9	2.47	1.45	0.86	52	74	90	2.27	315	18	1	2	146	700.8	204	823.2	4333	2
5	1	LowCa	Con	PostRE3	28.1	156.4	56.66	57.15	76.9	18.1	9967	45030	2259	1.129	0.6	0.9	1.244	0.3	0.5	27.4	53.62	1.57	3.07	1.16?	192	17	5	1025	242	4.24	91	2.9	2.47	1.45	0.86	52	74	90	2.27	315	18	1	2	146	700.8	204	823.2	4333	1
5	2	Ca	CWI	Pre_trial	28.1	156.4	56.66	57.15	76.9	18.1	9967	45030	2259	1.129	0.6	0.9	1.244	0.3	0.5	27.4	53.62	1.57	3.07	1.16?	192	17	5	1025	242	4.24	91	2.9	2.47	1.45	0.86	52	74	90	2.27	315	18	1	2	146	700.8	207	825	4342	1
5	2	Ca	CWI	Post_Meal	28.1	156.4	56.66	57.15	76.9	18.1	9967	45030	2259	1.129	0.6	0.9	1.244	0.3	0.5	27.4	53.62	1.57	3.07	1.16?	192	17	5	1025	242	4.24	91	2.9	2.47	1.45	0.86	52	74	90	2.27	315	18	1	2	146	700.8	207	825	4342	1
5	2	Ca	CWI	Pre_Ex	28.1	156.4	56.66	57.15	76.9	18.1	9967	45030	2259	1.129	0.6	0.9	1.244	0.3	0.5	27.4	53.62	1.57	3.07	1.16?	192	17	5	1025	242	4.24	91	2.9	2.47	1.45	0.86	52	74	90	2.27	315	18	1	2	146	700.8	207	825	4342	1
5	2	Ca	CWI	Ex	28.1	156.4	56.66	57.15	76.9	18.1	9967	45030	2259	1.129	0.6	0.9	1.244	0.3	0.5	27.4	53.62	1.57	3.07	1.16?	192	17	5	1025	242	4.24	91	2.9	2.47	1.45	0.86	52	74	90	2.27	315	18	1	2	146	700.8	207	825	4342	2
5	2	Ca	CWI	Post_ex	28.1	156.4	56.66	57.15	76.9	18.1	9967	45030	2259	1.129	0.6	0.9	1.244	0.3	0.5	27.4	53.62	1.57	3.07	1.16?	192	17	5	1025	242	4.24	91	2.9	2.47	1.45	0.86	52	74	90	2.27	315	18	1	2	146	700.8	207	825	4342	4
5	2	Ca	CWI	PostRE1	28.1	156.4	56.66	57.15	76.9	18.1	9967	45030	2259	1.129	0.6	0.9	1.244	0.3	0.5	27.4	53.62	1.57	3.07	1.16?	192	17	5	1025	242	4.24	91	2.9	2.47	1.45	0.86	52	74	90	2.27	315	18	1	2	146	700.8	207	825	4342	2
5	2	Ca	CWI	PostRE2	28.1	156.4	56.66	57.15	76.9	18.1	9967	45030	2259	1.129	0.6	0.9	1.244	0.3	0.5	27.4	53.62	1.57	3.07	1.16?	192	17	5	1025	242	4.24	91	2.9	2.47	1.45	0.86	52	74	90	2.27	315	18	1	2	146	700.8	207	825	4342	2
5	2	Ca	CWI	PostRE3	28.1	156.4	56.66	57.15	76.9	18.1	9967	45030	2259	1.129	0.6	0.9	1.244	0.3	0.5	27.4	53.62	1.57	3.07	1.16?	192	17	5	1025	242	4.24	91	2.9	2.47	1.45	0.86	52	74	90	2.27	315	18	1	2	146	700.8	207	825	4342	1
6	1	LowCa	CWI	Pre_trial	27.5	165.9	56.55	57.36	60	18.1	9870	44561	2575	1.095	0.3	0.7	1.251	0.3	0.6	28.09	55.93	1.61	3.21	1.05	203	19	30	1170	263	4.58	76	3.9	2.42	1.2	0.85	41	74	90	1.51	85	1	4	5	155	744	217	874.2	4601	2
6	1	LowCa	CWI	Post_Meal	27.5	165.9	56.55	57.36	60	18.1	9870	44561	2575	1.095	0.3	0.7	1.251	0.3	0.6	28.09	55.93	1.61	3.21	1.05	203	19	30	1170	263	4.58	76	3.9	2.42	1.2	0.85	41	74	90	1.51	85	1	4	5	155	744	217	874.2	4601	2
6	1	LowCa	CWI	Pre_Ex	27.5	165.9	56.55	57.36	60	18.1	9870	44561	2575	1.095	0.3	0.7	1.251	0.3	0.6	28.09	55.93	1.61	3.21	1.05	203	19	30	1170	263	4.58	76	3.9	2.42	1.2	0.85	41	74	90	1.51	85	1	4	5	155	744	217	874.2	4601	2
6	1	LowCa	CWI	Ex	27.5	165.9	56.55	57.36	60	18.1	9870	44561	2575	1.095	0.3	0.7	1.251	0.3	0.6	28.09	55.93	1.61	3.21	1.05	203	19	30	1170	263	4.58	76	3.9	2.42	1.2	0.85	41	74	90	1.51	85	1	4	5	155	744	217	874.2	4601	3
6	1	LowCa	CWI	Post_ex	27.5	165.9	56.55	57.36	60	18.1	9870	44561	2575	1.095	0.3	0.7	1.251	0.3	0.6	28.09	55.93	1.61	3.21	1.05	203	19	30	1170	263	4.58	76	3.9	2.42	1.2	0.85	41	74	90	1.51	85	1	4	5	155	744	217	874.2	4601	3
6	1	LowCa	CWI	PostRE1	27.5	165.9	56.55	57.36	60	18.1	9870	44561	2575	1.095	0.3	0.7	1.251	0.3	0.6	28.09	55.93	1.61	3.21	1.05	203	19	30	1170	263	4.58	76	3.9	2.42	1.2	0.85	41	74	90	1.51	85	1	4	5	155	744	217	874.2	4601	3
6	1	LowCa	CWI	PostRE2	27.5	165.9	56.55	57.36	60	18.1	9870	44561	2575	1.095	0.3	0.7	1.251	0.3	0.6	28.09	55.93	1.61	3.21	1.05	203	19	30	1170	263	4.58	76	3.9	2.42	1.2	0.85	41	74	90	1.51	85	1	4	5	155	744	217	874.2	4601	2
6	1	LowCa	CWI	PostRE3	27.5	165.9	56.55	57.36	60	18.1	9870	44561	2575	1.095	0.3	0.7	1.251	0.3	0.6	28.09	55.93	1.61	3.21	1.05	203	19	30	1170	263	4.58	76	3.9	2.42	1.2	0.85	41	74	90	1.51	85	1	4	5	155	744	217	874.2	4601	2
6	2	Ca	Con	Pre_trial	27.5	165.9	56.55	57.36	60	18.1	9870	44561	2575	1.095	0.3	0.7	1.251	0.3	0.6	28.09	55.93	1.61	3.21	1.05	203	19	30	1170	263	4.58	76	3.9	2.42	1.2	0.85	41	74	90	1.51	85	1	4	5	157	753.6	232	892.8	4699	3
6	2	Ca	Con	Post_Meal	27.5	165.9	56.55	57.36	60	18.1	9870	44561	2575	1.095	0.3	0.7	1.251	0.3	0.6	28.09	55.93	1.61	3.21	1.05	203	19	30	1170	263	4.58	76	3.9	2.42	1.2	0.85	41	74	90	1.51	85	1	4	5	157	753.6	232	892.8	4699	2
6	2	Ca	Con	Pre_Ex	27.5	165.9	56.55	57.36	60	18.1	9870	44561	2575	1.095	0.3	0.7	1.251	0.3	0.6	28.09	55.93	1.61	3.21	1.05	203	19	30	1170	263	4.58	76	3.9	2.42	1.2	0.85	41	74	90	1.51	85	1	4	5	157	753.6	232	892.8	4699	3
6	2	Ca	Con	Ex	27.5	165.9	56.55	57.36	60	18.1	9870	44561	2575	1.095	0.3	0.7	1.251	0.3	0.6	28.09	55.93	1.61	3.21	1.05	203	19	30	1170	263	4.58	76	3.9	2.42	1.2	0.85	41	74	90	1.51	85	1	4	5	157	753.6	232	892.8	4699	3
6	2	Ca	Con	Post_ex	27.5	165.9	56.55	57.36	60	18.1	9870	44561	2575	1.095	0.3	0.7	1.251	0.3	0.6	28.09	55.93	1.61	3.21	1.05	203	19	30	1170	263	4.58	76	3.9	2.42	1.2	0.85	41	74	90	1.51	85	1	4	5	157	753.6	232	892.8	4699	3
6	2	Ca	Con	PostRE1	27.5	165.9	56.55	57.36	60	18.1	9870	44561	2575	1.095	0.3	0.7	1.251	0.3	0.6	28.09	55.93	1.61	3.21	1.05	203	19	30	1170	263	4.58	76	3.9	2.42	1.2	0.85	41	74	90	1.51	85	1	4	5	157	753.6	232	892.8	4699	2
6	2	Ca	Con	PostRE2	27.5	165.9	56.55	57.36	60	18.1	9870	44561	2575	1.095	0.3	0.7	1.251	0.3	0.6	28.09	55.93	1.61	3.21	1.05	203	19	30	1170	263	4.58	76	3.9	2.42	1.2	0.85	41	74	90	1.51	85	1	4	5	157	753.6	232	892.8	4699	2
6	2	Ca	Con	PostRE3	27.5	165.9	56.55	57.36	60	18.1	9870	44561	2575	1.095	0.3	0.7	1.251	0.3	0.6	28.09	55.93	1.61	3.21	1.05	203	19	30	1170	263	4.58	76	3.9	2.42	1.2	0.85	41	74	90	1.51	85	1	4	5	157	753.6	232	892.8	4699	2
7	1	Ca	Con	Pre_trial	22.7	168.7	56.35	56.52	98	24.5	13389	41257	2046	0.909	-1.1	-0.7	0.916	-2.2	-1.9	28.41	56.79	1.61	3.21	1.07	189	19	0	1140	258	4.57	75	3.9	2.44	1.15	0.89	57	74	90	1.05	85	1	2	4	158	758.4	167	858.6	4519	3
7	1	Ca	Con	Post_Meal	22.7	168.7	56.35	56.52	98	24.5	13389	41257	2046	0.909	-1.1	-0.7	0.916	-2.2	-1.9	28.41	56.79	1.61	3.21	1.07	189	19	0	1140	258	4.57	75	3.9	2.44	1.15	0.89	57	74	90	1.05	85	1	2	4	158	758.4	167	858.6	4519	4
7	1	Ca	Con	Pre_Ex	22.7	168.7	56.35	56.52	98	24.5	13389	41257	2046	0.909	-1.1	-0.7	0.916	-2.2	-1.9	28.41	56.79	1.61	3.21	1.07	189	19	0	1140	258	4.57	75	3.9	2.44	1.15	0.89	57	74	90	1.05	85	1	2	4	158	758.4	167	858.6	4519	3
7	1	Ca	Con	Ex	22.7	168.7	56.35	56.52	98	24.5	13389	41257	2046	0.909	-1.1	-0.7	0.916	-2.2	-1.9	28.41	56.79	1.61	3.21	1.07	189	19	0	1140	258	4.57	75	3.9	2.44	1.15	0.89	57	74	90	1.05	85	1	2	4	158	758.4	167	858.6	4519	2
7	1	Ca	Con	Post_ex	22.7	168.7	56.35	56.52	98	24.5	13389	41257	2046	0.909	-1.1	-0.7	0.916	-2.2	-1.9	28.41	56.79	1.61	3.21	1.07	189	19	0	1140	258	4.57	75	3.9	2.44	1.15	0.89	57	74	90	1.05	85	1	2	4	158	758.4	167	858.6	4519	2
7	1	Ca	Con	PostRE1	22.7	168.7	56.35	56.52	98	24.5	13389	41257	2046	0.909	-1.1	-0.7	0.916	-2.2	-1.9	28.41	56.79	1.61	3.21	1.07	189	19	0	1140	258	4.57	75	3.9	2.44	1.15	0.89	57	74	90	1.05	85	1	2	4	158	758.4	167	858.6	4519	2
7	1	Ca	Con	PostRE2	22.7	168.7	56.35	56.52	98	24.5	13389	41257	2046	0.909	-1.1	-0.7	0.916	-2.2	-1.9	28.41	56.79	1.61	3.21	1.07	189	19	0	1140	258	4.57	75	3.9	2.44	1.15	0.89	57	74	90	1.05	85	1	2	4	158	758.4	167	858.6	4519	4
7	1	Ca	Con	PostRE3	22.7	168.7	56.35	56.52	98	24.5	13389	41257	2046	0.909	-1.1	-0.7	0.916	-2.2	-1.9	28.41	56.79	1.61	3.21	1.07	189	19	0	1140	258	4.57	75	3.9	2.44	1.15	0.89	57	74	90	1.05	85	1	2	4	158	758.4	167	858.6	4519
7	2	LowCa	CWI	Pre_trial	22.7	168.7	56.35	56.52	98	24.5	13389	41257	2046	0.909	-1.1	-0.7	0.916	-2.2	-1.9	28.41	56.79	1.61	3.21	1.07	189	19	0	1140	258	4.57	75	3.9	2.44	1.15	0.89	57	74	90	1.05	85	1	2	4	158	758.4	204	880.8	4636	2
7	2	LowCa	CWI	Post_Meal	22.7	168.7	56.35	56.52	98	24.5	13389	41257	2046	0.909	-1.1	-0.7	0.916	-2.2	-1.9	28.41	56.79	1.61	3.21	1.07	189	19	0	1140	258	4.57	75	3.9	2.44	1.15	0.89	57	74	90	1.05	85	1	2	4	158	758.4	204	880.8	4636	3
7	2	LowCa	CWI	Pre_Ex	22.7	168.7	56.35	56.52	98	24.5	13389	41257	2046	0.909	-1.1	-0.7	0.916	-2.2	-1.9	28.41	56.79	1.61	3.21	1.07	189	19	0	1140	258	4.57	75	3.9	2.44	1.15	0.89	57	74	90	1.05	85	1	2	4	158	758.4	204	880.8	4636	3
7	2	LowCa	CWI	Ex	22.7	168.7	56.35	56.52	98	24.5	13389	41257	2046	0.909	-1.1	-0.7	0.916	-2.2	-1.9	28.41	56.79	1.61	3.21	1.07	189	19	0	1140	258	4.57	75	3.9	2.44	1.15	0.89	57	74	90	1.05	85	1	2	4	158	758.4	204	880.8	4636	2
7	2	LowCa	CWI	Post_ex	22.7	168.7	56.35	56.52	98	24.5	13389	41257	2046	0.909	-1.1	-0.7	0.916	-2.2	-1.9	28.41	56.79	1.61	3.21	1.07	189	19	0	1140	258	4.57	75	3.9	2.44	1.15	0.89	57	74	90	1.05	85	1	2	4	158	758.4	204	880.8	4636	3
7	2	LowCa	CWI	PostRE1	22.7	168.7	56.35	56.52	98	24.5	13389	41257	2046	0.909	-1.1	-0.7	0.916	-2.2	-1.9	28.41	56.79	1.61	3.21	1.07	189	19	0	1140	258	4.57	75	3.9	2.44	1.15	0.89	57	74	90	1.05	85	1	2	4	158	758.4	204	880.8	4636	1
7	2	LowCa	CWI	PostRE2	22.7	168.7	56.35	56.52	98	24.5	13389	41257	2046	0.909	-1.1	-0.7	0.916	-2.2	-1.9	28.41	56.79	1.61	3.21	1.07	189	19	0	1140	258	4.57	75	3.9	2.44	1.15	0.89	57	74	90	1.05	85	1	2	4	158	758.4	204	880.8	4636	2
7	2	LowCa	CWI	PostRE3	22.7	168.7	56.35	56.52	98	24.5	13389	41257	2046	0.909	-1.1	-0.7	0.916	-2.2	-1.9	28.41	56.79	1.61	3.21	1.07	189	19	0	1140	258	4.57	75	3.9	2.44	1.15	0.89	57	74	90	1.05	85	1	2	4	158	758.4	204	880.8	4636
8	1	Ca	CWI	Pre_trial	23	166.5	57.55	58.27	81.7	19.7	10939	44259	2416	1.008	-0.3	0	1.122	-0.6	-0.4	29.08	57.61	1.69	3.35	1.11	180	21	30	1290	279	4.79	94	4	2.53	1.18	0.84	74	66	90	1.03	85	1	3	5	166	796.8	235	937.8	4936	2
8	1	Ca	CWI	Post_Meal	23	166.5	57.55	58.27	81.7	19.7	10939	44259	2416	1.008	-0.3	0	1.122	-0.6	-0.4	29.08	57.61	1.69	3.35	1.11	180	21	30	1290	279	4.79	94	4	2.53	1.18	0.84	74	66	90	1.03	85	1	3	5	166	796.8	235	937.8	4936	4
8	1	Ca	CWI	Pre_Ex	23	166.5	57.55	58.27	81.7	19.7	10939	44259	2416	1.008	-0.3	0	1.122	-0.6	-0.4	29.08	57.61	1.69	3.35	1.11	180	21	30	1290	279	4.79	94	4	2.53	1.18	0.84	74	66	90	1.03	85	1	3	5	166	796.8	235	937.8	4936	2
8	1	Ca	CWI	Ex	23	166.5	57.55	58.27	81.7	19.7	10939	44259	2416	1.008	-0.3	0	1.122	-0.6	-0.4	29.08	57.61	1.69	3.35	1.11	180	21	30	1290	279	4.79	94	4	2.53	1.18	0.84	74	66	90	1.03	85	1	3	5	166	796.8	235	937.8	4936	3
8	1	Ca	CWI	Post_ex	23	166.5	57.55	58.27	81.7	19.7	10939	44259	2416	1.008	-0.3	0	1.122	-0.6	-0.4	29.08	57.61	1.69	3.35	1.11	180	21	30	1290	279	4.79	94	4	2.53	1.18	0.84	74	66	90	1.03	85	1	3	5	166	796.8	235	937.8	4936	3
8	1	Ca	CWI	PostRE1	23	166.5	57.55	58.27	81.7	19.7	10939	44259	2416	1.008	-0.3	0	1.122	-0.6	-0.4	29.08	57.61	1.69	3.35	1.11	180	21	30	1290	279	4.79	94	4	2.53	1.18	0.84	74	66	90	1.03	85	1	3	5	166	796.8	235	937.8	4936	1
8	1	Ca	CWI	PostRE2	23	166.5	57.55	58.27	81.7	19.7	10939	44259	2416	1.008	-0.3	0	1.122	-0.6	-0.4	29.08	57.61	1.69	3.35	1.11	180	21	30	1290	279	4.79	94	4	2.53	1.18	0.84	74	66	90	1.03	85	1	3	5	166	796.8	235	937.8	4936	1
8	1	Ca	CWI	PostRE3	23	166.5	57.55	58.27	81.7	19.7	10939	44259	2416	1.008	-0.3	0	1.122	-0.6	-0.4	29.08	57.61	1.69	3.35	1.11	180	21	30	1290	279	4.79	94	4	2.53	1.18	0.84	74	66	90	1.03	85	1	3	5	166	796.8	235	937.8	4936	1
8	2	LowCa	Con	Pre_trial	23	166.5	57.55	58.27	81.7	19.7	10939	44259	2416	1.008	-0.3	0	1.122	-0.6	-0.4	29.08	57.61	1.69	3.35	1.11	180	21	30	1290	279	4.79	94	4	2.53	1.18	0.84	74	66	90	1.03	85	1	3	5	164	787.2	238	930	4895	2
8	2	LowCa	Con	Post_Meal	23	166.5	57.55	58.27	81.7	19.7	10939	44259	2416	1.008	-0.3	0	1.122	-0.6	-0.4	29.08	57.61	1.69	3.35	1.11	180	21	30	1290	279	4.79	94	4	2.53	1.18	0.84	74	66	90	1.03	85	1	3	5	164	787.2	238	930	4895	3
8	2	LowCa	Con	Pre_Ex	23	166.5	57.55	58.27	81.7	19.7	10939	44259	2416	1.008	-0.3	0	1.122	-0.6	-0.4	29.08	57.61	1.69	3.35	1.11	180	21	30	1290	279	4.79	94	4	2.53	1.18	0.84	74	66	90	1.03	85	1	3	5	164	787.2	238	930	4895	2
8	2	LowCa	Con	Ex	23	166.5	57.55	58.27	81.7	19.7	10939	44259	2416	1.008	-0.3	0	1.122	-0.6	-0.4	29.08	57.61	1.69	3.35	1.11	180	21	30	1290	279	4.79	94	4	2.53	1.18	0.84	74	66	90	1.03	85	1	3	5	164	787.2	238	930	4895	3
8	2	LowCa	Con	Post_ex	23	166.5	57.55	58.27	81.7	19.7	10939	44259	2416	1.008	-0.3	0	1.122	-0.6	-0.4	29.08	57.61	1.69	3.35	1.11	180	21	30	1290	279	4.79	94	4	2.53	1.18	0.84	74	66	90	1.03	85	1	3	5	164	787.2	238	930	4895	3
8	2	LowCa	Con	PostRE1	23	166.5	57.55	58.27	81.7	19.7	10939	44259	2416	1.008	-0.3	0	1.122	-0.6	-0.4	29.08	57.61	1.69	3.35	1.11	180	21	30	1290	279	4.79	94	4	2.53	1.18	0.84	74	66	90	1.03	85	1	3	5	164	787.2	238	930	4895	2
8	2	LowCa	Con	PostRE2	23	166.5	57.55	58.27	81.7	19.7	10939	44259	2416	1.008	-0.3	0	1.122	-0.6	-0.4	29.08	57.61	1.69	3.35	1.11	180	21	30	1290	279	4.79	94	4	2.53	1.18	0.84	74	66	90	1.03	85	1	3	5	164	787.2	238	930	4895	2
8	2	LowCa	Con	PostRE3	23	166.5	57.55	58.27	81.7	19.7	10939	44259	2416	1.008	-0.3	0	1.122	-0.6	-0.4	29.08	57.61	1.69	3.35	1.11	180	21	30	1290	279	4.79	94	4	2.53	1.18	0.84	74	66	90	1.03	85	1	3	5	164	787.2	238	930	4895	2
9	1	LowCa	Con	Pre_trial	27.2	176.2	67.85	68.14	77.5	17.7	11561	53611	3450	1.457	3	2.9	1.52	2.4	2.3	31.67	63	2.16	4.29	1.07	194	28	30	1710	338	4.95	85	4.3	2.53	1.27	0.83	49	74	90	0.77	85	1	1	1	203	974.4	266	1134	5968	1
9	1	LowCa	Con	Post_Meal	27.2	176.2	67.85	68.14	77.5	17.7	11561	53611	3450	1.457	3	2.9	1.52	2.4	2.3	31.67	63	2.16	4.29	1.07	194	28	30	1710	338	4.95	85	4.3	2.53	1.27	0.83	49	74	90	0.77	85	1	1	1	203	974.4	266	1134	5968	2
9	1	LowCa	Con	Pre_Ex	27.2	176.2	67.85	68.14	77.5	17.7	11561	53611	3450	1.457	3	2.9	1.52	2.4	2.3	31.67	63	2.16	4.29	1.07	194	28	30	1710	338	4.95	85	4.3	2.53	1.27	0.83	49	74	90	0.77	85	1	1	1	203	974.4	266	1134	5968	1
9	1	LowCa	Con	Ex	27.2	176.2	67.85	68.14	77.5	17.7	11561	53611	3450	1.457	3	2.9	1.52	2.4	2.3	31.67	63	2.16	4.29	1.07	194	28	30	1710	338	4.95	85	4.3	2.53	1.27	0.83	49	74	90	0.77	85	1	1	1	203	974.4	266	1134	5968	3
9	1	LowCa	Con	Post_ex	27.2	176.2	67.85	68.14	77.5	17.7	11561	53611	3450	1.457	3	2.9	1.52	2.4	2.3	31.67	63	2.16	4.29	1.07	194	28	30	1710	338	4.95	85	4.3	2.53	1.27	0.83	49	74	90	0.77	85	1	1	1	203	974.4	266	1134	5968	2
9	1	LowCa	Con	PostRE1	27.2	176.2	67.85	68.14	77.5	17.7	11561	53611	3450	1.457	3	2.9	1.52	2.4	2.3	31.67	63	2.16	4.29	1.07	194	28	30	1710	338	4.95	85	4.3	2.53	1.27	0.83	49	74	90	0.77	85	1	1	1	203	974.4	266	1134	5968	3
9	1	LowCa	Con	PostRE2	27.2	176.2	67.85	68.14	77.5	17.7	11561	53611	3450	1.457	3	2.9	1.52	2.4	2.3	31.67	63	2.16	4.29	1.07	194	28	30	1710	338	4.95	85	4.3	2.53	1.27	0.83	49	74	90	0.77	85	1	1	1	203	974.4	266	1134	5968
9	1	LowCa	Con	PostRE3	27.2	176.2	67.85	68.14	77.5	17.7	11561	53611	3450	1.457	3	2.9	1.52	2.4	2.3	31.67	63	2.16	4.29	1.07	194	28	30	1710	338	4.95	85	4.3	2.53	1.27	0.83	49	74	90	0.77	85	1	1	1	203	974.4	266	1134	5968
9	2	Ca	CWI	Pre_trial	27.2	176.2	67.85	68.14	77.5	17.7	11561	53611	3450	1.457	3	2.9	1.52	2.4	2.3	31.67	63	2.16	4.29	1.07	194	28	30	1710	338	4.95	85	4.3	2.53	1.27	0.83	49	74	90	0.77	85	1	1	1	203	974.4	289	1147.8	6041	1
9	2	Ca	CWI	Post_Meal	27.2	176.2	67.85	68.14	77.5	17.7	11561	53611	3450	1.457	3	2.9	1.52	2.4	2.3	31.67	63	2.16	4.29	1.07	194	28	30	1710	338	4.95	85	4.3	2.53	1.27	0.83	49	74	90	0.77	85	1	1	1	203	974.4	289	1147.8	6041	3
9	2	Ca	CWI	Pre_Ex	27.2	176.2	67.85	68.14	77.5	17.7	11561	53611	3450	1.457	3	2.9	1.52	2.4	2.3	31.67	63	2.16	4.29	1.07	194	28	30	1710	338	4.95	85	4.3	2.53	1.27	0.83	49	74	90	0.77	85	1	1	1	203	974.4	289	1147.8	6041	2
9	2	Ca	CWI	Ex	27.2	176.2	67.85	68.14	77.5	17.7	11561	53611	3450	1.457	3	2.9	1.52	2.4	2.3	31.67	63	2.16	4.29	1.07	194	28	30	1710	338	4.95	85	4.3	2.53	1.27	0.83	49	74	90	0.77	85	1	1	1	203	974.4	289	1147.8	6041	2
9	2	Ca	CWI	Post_ex	27.2	176.2	67.85	68.14	77.5	17.7	11561	53611	3450	1.457	3	2.9	1.52	2.4	2.3	31.67	63	2.16	4.29	1.07	194	28	30	1710	338	4.95	85	4.3	2.53	1.27	0.83	49	74	90	0.77	85	1	1	1	203	974.4	289	1147.8	6041	4
9	2	Ca	CWI	PostRE1	27.2	176.2	67.85	68.14	77.5	17.7	11561	53611	3450	1.457	3	2.9	1.52	2.4	2.3	31.67	63	2.16	4.29	1.07	194	28	30	1710	338	4.95	85	4.3	2.53	1.27	0.83	49	74	90	0.77	85	1	1	1	203	974.4	289	1147.8	6041	1
9	2	Ca	CWI	PostRE2	27.2	176.2	67.85	68.14	77.5	17.7	11561	53611	3450	1.457	3	2.9	1.52	2.4	2.3	31.67	63	2.16	4.29	1.07	194	28	30	1710	338	4.95	85	4.3	2.53	1.27	0.83	49	74	90	0.77	85	1	1	1	203	974.4	289	1147.8	6041	1
9	2	Ca	CWI	PostRE3	27.2	176.2	67.85	68.14	77.5	17.7	11561	53611	3450	1.457	3	2.9	1.52	2.4	2.3	31.67	63	2.16	4.29	1.07	194	28	30	1710	338	4.95	85	4.3	2.53	1.27	0.83	49	74	90	0.77	85	1	1	1	203	974.4	289	1147.8	6041	1
10	1	LowCa	CWI	Pre_trial	28.1	174.5	71.65	71.91	122.3	33.1	22793	45977	2904	0.966	-0.6	-0.9	1.097	-0.8	-1	26.97	53.76	1.94	3.87	1.02	197	24	30	1470	304	4.23	102	1.6	2.56	1.09	0.79	41	74	90	2.44	85	1	1	1	179	859.2	196	976.8	5141	2
10	1	LowCa	CWI	Post_Meal	28.1	174.5	71.65	71.91	122.3	33.1	22793	45977	2904	0.966	-0.6	-0.9	1.097	-0.8	-1	26.97	53.76	1.94	3.87	1.02	197	24	30	1470	304	4.23	102	1.6	2.56	1.09	0.79	41	74	90	2.44	85	1	1	1	179	859.2	196	976.8	5141	2
10	1	LowCa	CWI	Pre_Ex	28.1	174.5	71.65	71.91	122.3	33.1	22793	45977	2904	0.966	-0.6	-0.9	1.097	-0.8	-1	26.97	53.76	1.94	3.87	1.02	197	24	30	1470	304	4.23	102	1.6	2.56	1.09	0.79	41	74	90	2.44	85	1	1	1	179	859.2	196	976.8	5141	2
10	1	LowCa	CWI	Ex	28.1	174.5	71.65	71.91	122.3	33.1	22793	45977	2904	0.966	-0.6	-0.9	1.097	-0.8	-1	26.97	53.76	1.94	3.87	1.02	197	24	30	1470	304	4.23	102	1.6	2.56	1.09	0.79	41	74	90	2.44	85	1	1	1	179	859.2	196	976.8	5141	3
10	1	LowCa	CWI	Post_ex	28.1	174.5	71.65	71.91	122.3	33.1	22793	45977	2904	0.966	-0.6	-0.9	1.097	-0.8	-1	26.97	53.76	1.94	3.87	1.02	197	24	30	1470	304	4.23	102	1.6	2.56	1.09	0.79	41	74	90	2.44	85	1	1	1	179	859.2	196	976.8	5141	5
10	1	LowCa	CWI	PostRE1	28.1	174.5	71.65	71.91	122.3	33.1	22793	45977	2904	0.966	-0.6	-0.9	1.097	-0.8	-1	26.97	53.76	1.94	3.87	1.02	197	24	30	1470	304	4.23	102	1.6	2.56	1.09	0.79	41	74	90	2.44	85	1	1	1	179	859.2	196	976.8	5141	3
10	1	LowCa	CWI	PostRE2	28.1	174.5	71.65	71.91	122.3	33.1	22793	45977	2904	0.966	-0.6	-0.9	1.097	-0.8	-1	26.97	53.76	1.94	3.87	1.02	197	24	30	1470	304	4.23	102	1.6	2.56	1.09	0.79	41	74	90	2.44	85	1	1	1	179	859.2	196	976.8	5141	3
10	1	LowCa	CWI	PostRE3	28.1	174.5	71.65	71.91	122.3	33.1	22793	45977	2904	0.966	-0.6	-0.9	1.097	-0.8	-1	26.97	53.76	1.94	3.87	1.02	197	24	30	1470	304	4.23	102	1.6	2.56	1.09	0.79	41	74	90	2.44	85	1	1	1	179	859.2	196	976.8	5141	2
10	2	Ca	Con	Pre_trial	28.1	174.5	71.65	71.91	122.3	33.1	22793	45977	2904	0.966	-0.6	-0.9	1.097	-0.8	-1	26.97	53.76	1.94	3.87	1.02	197	24	30	1470	304	4.23	102	1.6	2.56	1.09	0.79	41	74	90	2.44	85	1	1	1	178	854.4	221	987	5195	2
10	2	Ca	Con	Post_Meal	28.1	174.5	71.65	71.91	122.3	33.1	22793	45977	2904	0.966	-0.6	-0.9	1.097	-0.8	-1	26.97	53.76	1.94	3.87	1.02	197	24	30	1470	304	4.23	102	1.6	2.56	1.09	0.79	41	74	90	2.44	85	1	1	1	178	854.4	221	987	5195	3
10	2	Ca	Con	Pre_Ex	28.1	174.5	71.65	71.91	122.3	33.1	22793	45977	2904	0.966	-0.6	-0.9	1.097	-0.8	-1	26.97	53.76	1.94	3.87	1.02	197	24	30	1470	304	4.23	102	1.6	2.56	1.09	0.79	41	74	90	2.44	85	1	1	1	178	854.4	221	987	5195	3
10	2	Ca	Con	Ex	28.1	174.5	71.65	71.91	122.3	33.1	22793	45977	2904	0.966	-0.6	-0.9	1.097	-0.8	-1	26.97	53.76	1.94	3.87	1.02	197	24	30	1470	304	4.23	102	1.6	2.56	1.09	0.79	41	74	90	2.44	85	1	1	1	178	854.4	221	987	5195	4
10	2	Ca	Con	Post_ex	28.1	174.5	71.65	71.91	122.3	33.1	22793	45977	2904	0.966	-0.6	-0.9	1.097	-0.8	-1	26.97	53.76	1.94	3.87	1.02	197	24	30	1470	304	4.23	102	1.6	2.56	1.09	0.79	41	74	90	2.44	85	1	1	1	178	854.4	221	987	5195	4
10	2	Ca	Con	PostRE1	28.1	174.5	71.65	71.91	122.3	33.1	22793	45977	2904	0.966	-0.6	-0.9	1.097	-0.8	-1	26.97	53.76	1.94	3.87	1.02	197	24	30	1470	304	4.23	102	1.6	2.56	1.09	0.79	41	74	90	2.44	85	1	1	1	178	854.4	221	987	5195	3
10	2	Ca	Con	PostRE2	28.1	174.5	71.65	71.91	122.3	33.1	22793	45977	2904	0.966	-0.6	-0.9	1.097	-0.8	-1	26.97	53.76	1.94	3.87	1.02	197	24	30	1470	304	4.23	102	1.6	2.56	1.09	0.79	41	74	90	2.44	85	1	1	1	178	854.4	221	987	5195	2
10	2	Ca	Con	PostRE3	28.1	174.5	71.65	71.91	122.3	33.1	22793	45977	2904	0.966	-0.6	-0.9	1.097	-0.8	-1	26.97	53.76	1.94	3.87	1.02	197	24	30	1470	304	4.23	102	1.6	2.56	1.09	0.79	41	74	90	2.44	85	1	1	1	178	854.4	221	987	5195	2
11	1	Ca	Con	Pre_trial	28.4	161.5	55.7	56.86	74.2	19.3	10420	43606	2041	1.012	-0.3	0.1	0.961	-1.9	-1.6	25.11	50.17	1.43	2.85	1.16??	179	16	30	990	238	4.18	55	3.5	2.44	1.1	0.9	66	74	90	2.17	105	1.7	1	1	154	739.2	215	868.2	4569	1
11	1	Ca	Con	Post_Meal	28.4	161.5	55.7	56.86	74.2	19.3	10420	43606	2041	1.012	-0.3	0.1	0.961	-1.9	-1.6	25.11	50.17	1.43	2.85	1.16??	179	16	30	990	238	4.18	55	3.5	2.44	1.1	0.9	66	74	90	2.17	105	1.7	1	1	154	739.2	215	868.2	4569	2
11	1	Ca	Con	Pre_Ex	28.4	161.5	55.7	56.86	74.2	19.3	10420	43606	2041	1.012	-0.3	0.1	0.961	-1.9	-1.6	25.11	50.17	1.43	2.85	1.16??	179	16	30	990	238	4.18	55	3.5	2.44	1.1	0.9	66	74	90	2.17	105	1.7	1	1	154	739.2	215	868.2	4569	3
11	1	Ca	Con	Ex	28.4	161.5	55.7	56.86	74.2	19.3	10420	43606	2041	1.012	-0.3	0.1	0.961	-1.9	-1.6	25.11	50.17	1.43	2.85	1.16??	179	16	30	990	238	4.18	55	3.5	2.44	1.1	0.9	66	74	90	2.17	105	1.7	1	1	154	739.2	215	868.2	4569	2
11	1	Ca	Con	Post_ex	28.4	161.5	55.7	56.86	74.2	19.3	10420	43606	2041	1.012	-0.3	0.1	0.961	-1.9	-1.6	25.11	50.17	1.43	2.85	1.16??	179	16	30	990	238	4.18	55	3.5	2.44	1.1	0.9	66	74	90	2.17	105	1.7	1	1	154	739.2	215	868.2	4569	3
11	1	Ca	Con	PostRE1	28.4	161.5	55.7	56.86	74.2	19.3	10420	43606	2041	1.012	-0.3	0.1	0.961	-1.9	-1.6	25.11	50.17	1.43	2.85	1.16??	179	16	30	990	238	4.18	55	3.5	2.44	1.1	0.9	66	74	90	2.17	105	1.7	1	1	154	739.2	215	868.2	4569	3
11	1	Ca	Con	PostRE2	28.4	161.5	55.7	56.86	74.2	19.3	10420	43606	2041	1.012	-0.3	0.1	0.961	-1.9	-1.6	25.11	50.17	1.43	2.85	1.16??	179	16	30	990	238	4.18	55	3.5	2.44	1.1	0.9	66	74	90	2.17	105	1.7	1	1	154	739.2	215	868.2	4569	2
11	1	Ca	Con	PostRE3	28.4	161.5	55.7	56.86	74.2	19.3	10420	43606	2041	1.012	-0.3	0.1	0.961	-1.9	-1.6	25.11	50.17	1.43	2.85	1.16??	179	16	30	990	238	4.18	55	3.5	2.44	1.1	0.9	66	74	90	2.17	105	1.7	1	1	154	739.2	215	868.2	4569	1
11	2	LowCa	CWI	Pre_trial	28.4	161.5	55.7	56.86	74.2	19.3	10420	43606	2041	1.012	-0.3	0.1	0.961	-1.9	-1.6	25.11	50.17	1.43	2.85	1.16??	179	16	30	990	238	4.18	55	3.5	2.44	1.1	0.9	66	74	90	2.17	105	1.7	1	1	156	748.8	221	881.4	4639	2
11	2	LowCa	CWI	Post_Meal	28.4	161.5	55.7	56.86	74.2	19.3	10420	43606	2041	1.012	-0.3	0.1	0.961	-1.9	-1.6	25.11	50.17	1.43	2.85	1.16??	179	16	30	990	238	4.18	55	3.5	2.44	1.1	0.9	66	74	90	2.17	105	1.7	1	1	156	748.8	221	881.4	4639	4
11	2	LowCa	CWI	Pre_Ex	28.4	161.5	55.7	56.86	74.2	19.3	10420	43606	2041	1.012	-0.3	0.1	0.961	-1.9	-1.6	25.11	50.17	1.43	2.85	1.16??	179	16	30	990	238	4.18	55	3.5	2.44	1.1	0.9	66	74	90	2.17	105	1.7	1	1	156	748.8	221	881.4	4639	3
11	2	LowCa	CWI	Ex	28.4	161.5	55.7	56.86	74.2	19.3	10420	43606	2041	1.012	-0.3	0.1	0.961	-1.9	-1.6	25.11	50.17	1.43	2.85	1.16??	179	16	30	990	238	4.18	55	3.5	2.44	1.1	0.9	66	74	90	2.17	105	1.7	1	1	156	748.8	221	881.4	4639	2
11	2	LowCa	CWI	Post_ex	28.4	161.5	55.7	56.86	74.2	19.3	10420	43606	2041	1.012	-0.3	0.1	0.961	-1.9	-1.6	25.11	50.17	1.43	2.85	1.16??	179	16	30	990	238	4.18	55	3.5	2.44	1.1	0.9	66	74	90	2.17	105	1.7	1	1	156	748.8	221	881.4	4639	1
11	2	LowCa	CWI	PostRE1	28.4	161.5	55.7	56.86	74.2	19.3	10420	43606	2041	1.012	-0.3	0.1	0.961	-1.9	-1.6	25.11	50.17	1.43	2.85	1.16??	179	16	30	990	238	4.18	55	3.5	2.44	1.1	0.9	66	74	90	2.17	105	1.7	1	1	156	748.8	221	881.4	4639	2
11	2	LowCa	CWI	PostRE2	28.4	161.5	55.7	56.86	74.2	19.3	10420	43606	2041	1.012	-0.3	0.1	0.961	-1.9	-1.6	25.11	50.17	1.43	2.85	1.16??	179	16	30	990	238	4.18	55	3.5	2.44	1.1	0.9	66	74	90	2.17	105	1.7	1	1	156	748.8	221	881.4	4639	3
11	2	LowCa	CWI	PostRE3	28.4	161.5	55.7	56.86	74.2	19.3	10420	43606	2041	1.012	-0.3	0.1	0.961	-1.9	-1.6	25.11	50.17	1.43	2.85	1.16??	179	16	30	990	238	4.18	55	3.5	2.44	1.1	0.9	66	74	90	2.17	105	1.7	1	1	156	748.8	221	881.4	4639	1
12	1	Ca	CWI	Pre_trial	24.6	173.5	64.5	65.77	65.6	17.7	11035	51484	2638	0.974	-0.6	-0.5	1.238	0.2	0.3	30.83	61.51	2.03	4.05	1.13??	206	27	30	1650	329	5.01	65	3.4	2.42	1.12	0.86	73	76	90	1.79	357	1	1	3	197	945.6	264	1104	5811	1
12	1	Ca	CWI	Post_Meal	24.6	173.5	64.5	65.77	65.6	17.7	11035	51484	2638	0.974	-0.6	-0.5	1.238	0.2	0.3	30.83	61.51	2.03	4.05	1.13??	206	27	30	1650	329	5.01	65	3.4	2.42	1.12	0.86	73	76	90	1.79	357	1	1	3	197	945.6	264	1104	5811	1
12	1	Ca	CWI	Pre_Ex	24.6	173.5	64.5	65.77	65.6	17.7	11035	51484	2638	0.974	-0.6	-0.5	1.238	0.2	0.3	30.83	61.51	2.03	4.05	1.13??	206	27	30	1650	329	5.01	65	3.4	2.42	1.12	0.86	73	76	90	1.79	357	1	1	3	197	945.6	264	1104	5811	3
12	1	Ca	CWI	Ex	24.6	173.5	64.5	65.77	65.6	17.7	11035	51484	2638	0.974	-0.6	-0.5	1.238	0.2	0.3	30.83	61.51	2.03	4.05	1.13??	206	27	30	1650	329	5.01	65	3.4	2.42	1.12	0.86	73	76	90	1.79	357	1	1	3	197	945.6	264	1104	5811	3
12	1	Ca	CWI	Post_ex	24.6	173.5	64.5	65.77	65.6	17.7	11035	51484	2638	0.974	-0.6	-0.5	1.238	0.2	0.3	30.83	61.51	2.03	4.05	1.13??	206	27	30	1650	329	5.01	65	3.4	2.42	1.12	0.86	73	76	90	1.79	357	1	1	3	197	945.6	264	1104	5811	4
12	1	Ca	CWI	PostRE1	24.6	173.5	64.5	65.77	65.6	17.7	11035	51484	2638	0.974	-0.6	-0.5	1.238	0.2	0.3	30.83	61.51	2.03	4.05	1.13??	206	27	30	1650	329	5.01	65	3.4	2.42	1.12	0.86	73	76	90	1.79	357	1	1	3	197	945.6	264	1104	5811	1
12	1	Ca	CWI	PostRE2	24.6	173.5	64.5	65.77	65.6	17.7	11035	51484	2638	0.974	-0.6	-0.5	1.238	0.2	0.3	30.83	61.51	2.03	4.05	1.13??	206	27	30	1650	329	5.01	65	3.4	2.42	1.12	0.86	73	76	90	1.79	357	1	1	3	197	945.6	264	1104	5811	1
12	1	Ca	CWI	PostRE3	24.6	173.5	64.5	65.77	65.6	17.7	11035	51484	2638	0.974	-0.6	-0.5	1.238	0.2	0.3	30.83	61.51	2.03	4.05	1.13??	206	27	30	1650	329	5.01	65	3.4	2.42	1.12	0.86	73	76	90	1.79	357	1	1	3	197	945.6	264	1104	5811	1
12	2	LowCa	Con	Pre_trial	24.6	173.5	64.5	65.77	65.6	17.7	11035	51484	2638	0.974	-0.6	-0.5	1.238	0.2	0.3	30.83	61.51	2.03	4.05	1.13??	206	27	30	1650	329	5.01	65	3.4	2.42	1.12	0.86	73	76	90	1.79	357	1	1	3	197	945.6	263	1103.4	5807	1
12	2	LowCa	Con	Post_Meal	24.6	173.5	64.5	65.77	65.6	17.7	11035	51484	2638	0.974	-0.6	-0.5	1.238	0.2	0.3	30.83	61.51	2.03	4.05	1.13??	206	27	30	1650	329	5.01	65	3.4	2.42	1.12	0.86	73	76	90	1.79	357	1	1	3	197	945.6	263	1103.4	5807	1
12	2	LowCa	Con	Pre_Ex	24.6	173.5	64.5	65.77	65.6	17.7	11035	51484	2638	0.974	-0.6	-0.5	1.238	0.2	0.3	30.83	61.51	2.03	4.05	1.13??	206	27	30	1650	329	5.01	65	3.4	2.42	1.12	0.86	73	76	90	1.79	357	1	1	3	197	945.6	263	1103.4	5807	1
12	2	LowCa	Con	Ex	24.6	173.5	64.5	65.77	65.6	17.7	11035	51484	2638	0.974	-0.6	-0.5	1.238	0.2	0.3	30.83	61.51	2.03	4.05	1.13??	206	27	30	1650	329	5.01	65	3.4	2.42	1.12	0.86	73	76	90	1.79	357	1	1	3	197	945.6	263	1103.4	5807	5
12	2	LowCa	Con	Post_ex	24.6	173.5	64.5	65.77	65.6	17.7	11035	51484	2638	0.974	-0.6	-0.5	1.238	0.2	0.3	30.83	61.51	2.03	4.05	1.13??	206	27	30	1650	329	5.01	65	3.4	2.42	1.12	0.86	73	76	90	1.79	357	1	1	3	197	945.6	263	1103.4	5807	5
12	2	LowCa	Con	PostRE1	24.6	173.5	64.5	65.77	65.6	17.7	11035	51484	2638	0.974	-0.6	-0.5	1.238	0.2	0.3	30.83	61.51	2.03	4.05	1.13??	206	27	30	1650	329	5.01	65	3.4	2.42	1.12	0.86	73	76	90	1.79	357	1	1	3	197	945.6	263	1103.4	5807	1
12	2	LowCa	Con	PostRE2	24.6	173.5	64.5	65.77	65.6	17.7	11035	51484	2638	0.974	-0.6	-0.5	1.238	0.2	0.3	30.83	61.51	2.03	4.05	1.13??	206	27	30	1650	329	5.01	65	3.4	2.42	1.12	0.86	73	76	90	1.79	357	1	1	3	197	945.6	263	1103.4	5807	1
12	2	LowCa	Con	PostRE3	24.6	173.5	64.5	65.77	65.6	17.7	11035	51484	2638	0.974	-0.6	-0.5	1.238	0.2	0.3	30.83	61.51	2.03	4.05	1.13??	206	27	30	1650	329	5.01	65	3.4	2.42	1.12	0.86	73	76	90	1.79	357	1	1	3	197	945.6	263	1103.4	5807	1
13	1	LowCa	Con	Pre_trial	22.3	171.9	62.55	62.97	92.7	24.5	14782	45511	2453	0.977	-0.5	-0.5	1.138	-0.5	-0.4	24.62	49.16	1.55	3.1	1.12	179	20	0	1200	267	4.24	61	3.1	2.56	1.29	0.82	60	71	90	1.45	85	1	2	4	160	768	213	895.8	4715	3
13	1	LowCa	Con	Post_Meal	22.3	171.9	62.55	62.97	92.7	24.5	14782	45511	2453	0.977	-0.5	-0.5	1.138	-0.5	-0.4	24.62	49.16	1.55	3.1	1.12	179	20	0	1200	267	4.24	61	3.1	2.56	1.29	0.82	60	71	90	1.45	85	1	2	4	160	768	213	895.8	4715	2
13	1	LowCa	Con	Pre_Ex	22.3	171.9	62.55	62.97	92.7	24.5	14782	45511	2453	0.977	-0.5	-0.5	1.138	-0.5	-0.4	24.62	49.16	1.55	3.1	1.12	179	20	0	1200	267	4.24	61	3.1	2.56	1.29	0.82	60	71	90	1.45	85	1	2	4	160	768	213	895.8	4715	2
13	1	LowCa	Con	Ex	22.3	171.9	62.55	62.97	92.7	24.5	14782	45511	2453	0.977	-0.5	-0.5	1.138	-0.5	-0.4	24.62	49.16	1.55	3.1	1.12	179	20	0	1200	267	4.24	61	3.1	2.56	1.29	0.82	60	71	90	1.45	85	1	2	4	160	768	213	895.8	4715	2
13	1	LowCa	Con	Post_ex	22.3	171.9	62.55	62.97	92.7	24.5	14782	45511	2453	0.977	-0.5	-0.5	1.138	-0.5	-0.4	24.62	49.16	1.55	3.1	1.12	179	20	0	1200	267	4.24	61	3.1	2.56	1.29	0.82	60	71	90	1.45	85	1	2	4	160	768	213	895.8	4715	2
13	1	LowCa	Con	PostRE1	22.3	171.9	62.55	62.97	92.7	24.5	14782	45511	2453	0.977	-0.5	-0.5	1.138	-0.5	-0.4	24.62	49.16	1.55	3.1	1.12	179	20	0	1200	267	4.24	61	3.1	2.56	1.29	0.82	60	71	90	1.45	85	1	2	4	160	768	213	895.8	4715	2
13	1	LowCa	Con	PostRE2	22.3	171.9	62.55	62.97	92.7	24.5	14782	45511	2453	0.977	-0.5	-0.5	1.138	-0.5	-0.4	24.62	49.16	1.55	3.1	1.12	179	20	0	1200	267	4.24	61	3.1	2.56	1.29	0.82	60	71	90	1.45	85	1	2	4	160	768	213	895.8	4715	2
13	1	LowCa	Con	PostRE3	22.3	171.9	62.55	62.97	92.7	24.5	14782	45511	2453	0.977	-0.5	-0.5	1.138	-0.5	-0.4	24.62	49.16	1.55	3.1	1.12	179	20	0	1200	267	4.24	61	3.1	2.56	1.29	0.82	60	71	90	1.45	85	1	2	4	160	768	213	895.8	4715	1
13	2	Ca	CWI	Pre_trial	22.3	171.9	62.55	62.97	92.7	24.5	14782	45511	2453	0.977	-0.5	-0.5	1.138	-0.5	-0.4	24.62	49.16	1.55	3.1	1.12	179	20	0	1200	267	4.24	61	3.1	2.56	1.29	0.82	60	71	90	1.45	85	1	2	4	160	768	229	905.4	4765	1
13	2	Ca	CWI	Post_Meal	22.3	171.9	62.55	62.97	92.7	24.5	14782	45511	2453	0.977	-0.5	-0.5	1.138	-0.5	-0.4	24.62	49.16	1.55	3.1	1.12	179	20	0	1200	267	4.24	61	3.1	2.56	1.29	0.82	60	71	90	1.45	85	1	2	4	160	768	229	905.4	4765	1
13	2	Ca	CWI	Pre_Ex	22.3	171.9	62.55	62.97	92.7	24.5	14782	45511	2453	0.977	-0.5	-0.5	1.138	-0.5	-0.4	24.62	49.16	1.55	3.1	1.12	179	20	0	1200	267	4.24	61	3.1	2.56	1.29	0.82	60	71	90	1.45	85	1	2	4	160	768	229	905.4	4765	1
13	2	Ca	CWI	Ex	22.3	171.9	62.55	62.97	92.7	24.5	14782	45511	2453	0.977	-0.5	-0.5	1.138	-0.5	-0.4	24.62	49.16	1.55	3.1	1.12	179	20	0	1200	267	4.24	61	3.1	2.56	1.29	0.82	60	71	90	1.45	85	1	2	4	160	768	229	905.4	4765	1
13	2	Ca	CWI	Post_ex	22.3	171.9	62.55	62.97	92.7	24.5	14782	45511	2453	0.977	-0.5	-0.5	1.138	-0.5	-0.4	24.62	49.16	1.55	3.1	1.12	179	20	0	1200	267	4.24	61	3.1	2.56	1.29	0.82	60	71	90	1.45	85	1	2	4	160	768	229	905.4	4765	2
13	2	Ca	CWI	PostRE1	22.3	171.9	62.55	62.97	92.7	24.5	14782	45511	2453	0.977	-0.5	-0.5	1.138	-0.5	-0.4	24.62	49.16	1.55	3.1	1.12	179	20	0	1200	267	4.24	61	3.1	2.56	1.29	0.82	60	71	90	1.45	85	1	2	4	160	768	229	905.4	4765	1
13	2	Ca	CWI	PostRE2	22.3	171.9	62.55	62.97	92.7	24.5	14782	45511	2453	0.977	-0.5	-0.5	1.138	-0.5	-0.4	24.62	49.16	1.55	3.1	1.12	179	20	0	1200	267	4.24	61	3.1	2.56	1.29	0.82	60	71	90	1.45	85	1	2	4	160	768	229	905.4	4765	1
13	2	Ca	CWI	PostRE3	22.3	171.9	62.55	62.97	92.7	24.5	14782	45511	2453	0.977	-0.5	-0.5	1.138	-0.5	-0.4	24.62	49.16	1.55	3.1	1.12	179	20	0	1200	267	4.24	61	3.1	2.56	1.29	0.82	60	71	90	1.45	85	1	2	4	160	768	229	905.4	4765	1
14	1	LowCa	CWI	Pre_trial	28.1	185.6	77.85	77.74	67.2	20.3	15259	59877	3437	1.149	0.7	0.3	1.149	1.6	1.2	24.7	48.81	1.92	3.79	1.20?	177	28	0	1680	333	4.29	73	4.8	2.44	1.24	0.75	43	74	90	1.31	389	1	1	1	201	964.8	316	1154.4	6076	3
14	1	LowCa	CWI	Post_Meal	28.1	185.6	77.85	77.74	67.2	20.3	15259	59877	3437	1.149	0.7	0.3	1.149	1.6	1.2	24.7	48.81	1.92	3.79	1.20?	177	28	0	1680	333	4.29	73	4.8	2.44	1.24	0.75	43	74	90	1.31	389	1	1	1	201	964.8	316	1154.4	6076	3
14	1	LowCa	CWI	Pre_Ex	28.1	185.6	77.85	77.74	67.2	20.3	15259	59877	3437	1.149	0.7	0.3	1.149	1.6	1.2	24.7	48.81	1.92	3.79	1.20?	177	28	0	1680	333	4.29	73	4.8	2.44	1.24	0.75	43	74	90	1.31	389	1	1	1	201	964.8	316	1154.4	6076	2
14	1	LowCa	CWI	Ex	28.1	185.6	77.85	77.74	67.2	20.3	15259	59877	3437	1.149	0.7	0.3	1.149	1.6	1.2	24.7	48.81	1.92	3.79	1.20?	177	28	0	1680	333	4.29	73	4.8	2.44	1.24	0.75	43	74	90	1.31	389	1	1	1	201	964.8	316	1154.4	6076	2
14	1	LowCa	CWI	Post_ex	28.1	185.6	77.85	77.74	67.2	20.3	15259	59877	3437	1.149	0.7	0.3	1.149	1.6	1.2	24.7	48.81	1.92	3.79	1.20?	177	28	0	1680	333	4.29	73	4.8	2.44	1.24	0.75	43	74	90	1.31	389	1	1	1	201	964.8	316	1154.4	6076	3
14	1	LowCa	CWI	PostRE1	28.1	185.6	77.85	77.74	67.2	20.3	15259	59877	3437	1.149	0.7	0.3	1.149	1.6	1.2	24.7	48.81	1.92	3.79	1.20?	177	28	0	1680	333	4.29	73	4.8	2.44	1.24	0.75	43	74	90	1.31	389	1	1	1	201	964.8	316	1154.4	6076	5
14	1	LowCa	CWI	PostRE2	28.1	185.6	77.85	77.74	67.2	20.3	15259	59877	3437	1.149	0.7	0.3	1.149	1.6	1.2	24.7	48.81	1.92	3.79	1.20?	177	28	0	1680	333	4.29	73	4.8	2.44	1.24	0.75	43	74	90	1.31	389	1	1	1	201	964.8	316	1154.4	6076	2
14	1	LowCa	CWI	PostRE3	28.1	185.6	77.85	77.74	67.2	20.3	15259	59877	3437	1.149	0.7	0.3	1.149	1.6	1.2	24.7	48.81	1.92	3.79	1.20?	177	28	0	1680	333	4.29	73	4.8	2.44	1.24	0.75	43	74	90	1.31	389	1	1	1	201	964.8	316	1154.4	6076	2
14	2	Ca	Con	Pre_trial	28.1	185.6	77.85	77.74	67.2	20.3	15259	59877	3437	1.149	0.7	0.3	1.149	1.6	1.2	24.7	48.81	1.92	3.79	1.20?	177	28	0	1680	333	4.29	73	4.8	2.44	1.24	0.75	43	74	90	1.31	389	1	1	1	201	964.8	302	1146	6032	2
14	2	Ca	Con	Post_Meal	28.1	185.6	77.85	77.74	67.2	20.3	15259	59877	3437	1.149	0.7	0.3	1.149	1.6	1.2	24.7	48.81	1.92	3.79	1.20?	177	28	0	1680	333	4.29	73	4.8	2.44	1.24	0.75	43	74	90	1.31	389	1	1	1	201	964.8	302	1146	6032	4
14	2	Ca	Con	Pre_Ex	28.1	185.6	77.85	77.74	67.2	20.3	15259	59877	3437	1.149	0.7	0.3	1.149	1.6	1.2	24.7	48.81	1.92	3.79	1.20?	177	28	0	1680	333	4.29	73	4.8	2.44	1.24	0.75	43	74	90	1.31	389	1	1	1	201	964.8	302	1146	6032	3
14	2	Ca	Con	Ex	28.1	185.6	77.85	77.74	67.2	20.3	15259	59877	3437	1.149	0.7	0.3	1.149	1.6	1.2	24.7	48.81	1.92	3.79	1.20?	177	28	0	1680	333	4.29	73	4.8	2.44	1.24	0.75	43	74	90	1.31	389	1	1	1	201	964.8	302	1146	6032	3
14	2	Ca	Con	Post_ex	28.1	185.6	77.85	77.74	67.2	20.3	15259	59877	3437	1.149	0.7	0.3	1.149	1.6	1.2	24.7	48.81	1.92	3.79	1.20?	177	28	0	1680	333	4.29	73	4.8	2.44	1.24	0.75	43	74	90	1.31	389	1	1	1	201	964.8	302	1146	6032	2
14	2	Ca	Con	PostRE1	28.1	185.6	77.85	77.74	67.2	20.3	15259	59877	3437	1.149	0.7	0.3	1.149	1.6	1.2	24.7	48.81	1.92	3.79	1.20?	177	28	0	1680	333	4.29	73	4.8	2.44	1.24	0.75	43	74	90	1.31	389	1	1	1	201	964.8	302	1146	6032	3
14	2	Ca	Con	PostRE2	28.1	185.6	77.85	77.74	67.2	20.3	15259	59877	3437	1.149	0.7	0.3	1.149	1.6	1.2	24.7	48.81	1.92	3.79	1.20?	177	28	0	1680	333	4.29	73	4.8	2.44	1.24	0.75	43	74	90	1.31	389	1	1	1	201	964.8	302	1146	6032	3
14	2	Ca	Con	PostRE3	28.1	185.6	77.85	77.74	67.2	20.3	15259	59877	3437	1.149	0.7	0.3	1.149	1.6	1.2	24.7	48.81	1.92	3.79	1.20?	177	28	0	1680	333	4.29	73	4.8	2.44	1.24	0.75	43	74	90	1.31	389	1	1	1	201	964.8	302	1146	6032	2
15	1	Ca	Con	Pre_trial	18.4	164	54.75	55.45	52.1	18.9	9948	42735	2427	1.028	-0.2	0.2	1.297		0.9	29.85	58.34	1.65	3.23	1.07	190	18	30	1110	254	4.58	98	1.8	2.53	1.27	0.86	62	67	90	1.32	85	1	5	5	152	729.6	211	856.2	4506	1
15	1	Ca	Con	Post_Meal	18.4	164	54.75	55.45	52.1	18.9	9948	42735	2427	1.028	-0.2	0.2	1.297		0.9	29.85	58.34	1.65	3.23	1.07	190	18	30	1110	254	4.58	98	1.8	2.53	1.27	0.86	62	67	90	1.32	85	1	5	5	152	729.6	211	856.2	4506	2
15	1	Ca	Con	Pre_Ex	18.4	164	54.75	55.45	52.1	18.9	9948	42735	2427	1.028	-0.2	0.2	1.297		0.9	29.85	58.34	1.65	3.23	1.07	190	18	30	1110	254	4.58	98	1.8	2.53	1.27	0.86	62	67	90	1.32	85	1	5	5	152	729.6	211	856.2	4506	2
15	1	Ca	Con	Ex	18.4	164	54.75	55.45	52.1	18.9	9948	42735	2427	1.028	-0.2	0.2	1.297		0.9	29.85	58.34	1.65	3.23	1.07	190	18	30	1110	254	4.58	98	1.8	2.53	1.27	0.86	62	67	90	1.32	85	1	5	5	152	729.6	211	856.2	4506	2
15	1	Ca	Con	Post_ex	18.4	164	54.75	55.45	52.1	18.9	9948	42735	2427	1.028	-0.2	0.2	1.297		0.9	29.85	58.34	1.65	3.23	1.07	190	18	30	1110	254	4.58	98	1.8	2.53	1.27	0.86	62	67	90	1.32	85	1	5	5	152	729.6	211	856.2	4506	2
15	1	Ca	Con	PostRE1	18.4	164	54.75	55.45	52.1	18.9	9948	42735	2427	1.028	-0.2	0.2	1.297		0.9	29.85	58.34	1.65	3.23	1.07	190	18	30	1110	254	4.58	98	1.8	2.53	1.27	0.86	62	67	90	1.32	85	1	5	5	152	729.6	211	856.2	4506	2
15	1	Ca	Con	PostRE2	18.4	164	54.75	55.45	52.1	18.9	9948	42735	2427	1.028	-0.2	0.2	1.297		0.9	29.85	58.34	1.65	3.23	1.07	190	18	30	1110	254	4.58	98	1.8	2.53	1.27	0.86	62	67	90	1.32	85	1	5	5	152	729.6	211	856.2	4506	3
15	1	Ca	Con	PostRE3	18.4	164	54.75	55.45	52.1	18.9	9948	42735	2427	1.028	-0.2	0.2	1.297		0.9	29.85	58.34	1.65	3.23	1.07	190	18	30	1110	254	4.58	98	1.8	2.53	1.27	0.86	62	67	90	1.32	85	1	5	5	152	729.6	211	856.2	4506	1
15	2	LowCa	CWI	Pre_trial	18.4	164	54.75	55.45	52.1	18.9	9948	42735	2427	1.028	-0.2	0.2	1.297		0.9	29.85	58.34	1.65	3.23	1.07	190	18	30	1110	254	4.58	98	1.8	2.53	1.27	0.86	62	67	90	1.32	85	1	5	5	152	729.6	220	861.6	4535	2
15	2	LowCa	CWI	Post_Meal	18.4	164	54.75	55.45	52.1	18.9	9948	42735	2427	1.028	-0.2	0.2	1.297		0.9	29.85	58.34	1.65	3.23	1.07	190	18	30	1110	254	4.58	98	1.8	2.53	1.27	0.86	62	67	90	1.32	85	1	5	5	152	729.6	220	861.6	4535	2
15	2	LowCa	CWI	Pre_Ex	18.4	164	54.75	55.45	52.1	18.9	9948	42735	2427	1.028	-0.2	0.2	1.297		0.9	29.85	58.34	1.65	3.23	1.07	190	18	30	1110	254	4.58	98	1.8	2.53	1.27	0.86	62	67	90	1.32	85	1	5	5	152	729.6	220	861.6	4535	2
15	2	LowCa	CWI	Ex	18.4	164	54.75	55.45	52.1	18.9	9948	42735	2427	1.028	-0.2	0.2	1.297		0.9	29.85	58.34	1.65	3.23	1.07	190	18	30	1110	254	4.58	98	1.8	2.53	1.27	0.86	62	67	90	1.32	85	1	5	5	152	729.6	220	861.6	4535	3
15	2	LowCa	CWI	Post_ex	18.4	164	54.75	55.45	52.1	18.9	9948	42735	2427	1.028	-0.2	0.2	1.297		0.9	29.85	58.34	1.65	3.23	1.07	190	18	30	1110	254	4.58	98	1.8	2.53	1.27	0.86	62	67	90	1.32	85	1	5	5	152	729.6	220	861.6	4535	3
15	2	LowCa	CWI	PostRE1	18.4	164	54.75	55.45	52.1	18.9	9948	42735	2427	1.028	-0.2	0.2	1.297		0.9	29.85	58.34	1.65	3.23	1.07	190	18	30	1110	254	4.58	98	1.8	2.53	1.27	0.86	62	67	90	1.32	85	1	5	5	152	729.6	220	861.6	4535	1
15	2	LowCa	CWI	PostRE2	18.4	164	54.75	55.45	52.1	18.9	9948	42735	2427	1.028	-0.2	0.2	1.297		0.9	29.85	58.34	1.65	3.23	1.07	190	18	30	1110	254	4.58	98	1.8	2.53	1.27	0.86	62	67	90	1.32	85	1	5	5	152	729.6	220	861.6	4535	2
15	2	LowCa	CWI	PostRE3	18.4	164	54.75	55.45	52.1	18.9	9948	42735	2427	1.028	-0.2	0.2	1.297		0.9	29.85	58.34	1.65	3.23	1.07	190	18	30	1110	254	4.58	98	1.8	2.53	1.27	0.86	62	67	90	1.32	85	1	5	5	152	729.6	220	861.6	4535	2
16	1	Ca	CWI	Pre_trial	18	154.6	47.8	49.01	71.2	23.7	10874	34958	2272	1.268	1.6	2.3	1.214		0.3	30.54	60.06	1.5	2.95	1.08	197	16	30	990	238	4.85	65	1.9	2.51	1.35	0.86	62	64	90	1.75	342	8.8	1	2	147	705.6	193	821.4	4323	2
16	1	Ca	CWI	Post_Meal	18	154.6	47.8	49.01	71.2	23.7	10874	34958	2272	1.268	1.6	2.3	1.214		0.3	30.54	60.06	1.5	2.95	1.08	197	16	30	990	238	4.85	65	1.9	2.51	1.35	0.86	62	64	90	1.75	342	8.8	1	2	147	705.6	193	821.4	4323	5
16	1	Ca	CWI	Pre_Ex	18	154.6	47.8	49.01	71.2	23.7	10874	34958	2272	1.268	1.6	2.3	1.214		0.3	30.54	60.06	1.5	2.95	1.08	197	16	30	990	238	4.85	65	1.9	2.51	1.35	0.86	62	64	90	1.75	342	8.8	1	2	147	705.6	193	821.4	4323	3
16	1	Ca	CWI	Ex	18	154.6	47.8	49.01	71.2	23.7	10874	34958	2272	1.268	1.6	2.3	1.214		0.3	30.54	60.06	1.5	2.95	1.08	197	16	30	990	238	4.85	65	1.9	2.51	1.35	0.86	62	64	90	1.75	342	8.8	1	2	147	705.6	193	821.4	4323	3
16	1	Ca	CWI	Post_ex	18	154.6	47.8	49.01	71.2	23.7	10874	34958	2272	1.268	1.6	2.3	1.214		0.3	30.54	60.06	1.5	2.95	1.08	197	16	30	990	238	4.85	65	1.9	2.51	1.35	0.86	62	64	90	1.75	342	8.8	1	2	147	705.6	193	821.4	4323	2
16	1	Ca	CWI	PostRE1	18	154.6	47.8	49.01	71.2	23.7	10874	34958	2272	1.268	1.6	2.3	1.214		0.3	30.54	60.06	1.5	2.95	1.08	197	16	30	990	238	4.85	65	1.9	2.51	1.35	0.86	62	64	90	1.75	342	8.8	1	2	147	705.6	193	821.4	4323	1
16	1	Ca	CWI	PostRE2	18	154.6	47.8	49.01	71.2	23.7	10874	34958	2272	1.268	1.6	2.3	1.214		0.3	30.54	60.06	1.5	2.95	1.08	197	16	30	990	238	4.85	65	1.9	2.51	1.35	0.86	62	64	90	1.75	342	8.8	1	2	147	705.6	193	821.4	4323	2
16	1	Ca	CWI	PostRE3	18	154.6	47.8	49.01	71.2	23.7	10874	34958	2272	1.268	1.6	2.3	1.214		0.3	30.54	60.06	1.5	2.95	1.08	197	16	30	990	238	4.85	65	1.9	2.51	1.35	0.86	62	64	90	1.75	342	8.8	1	2	147	705.6	193	821.4	4323	2
16	2	LowCa	Con	Pre_trial	18	154.6	47.8	49.01	71.2	23.7	10874	34958	2272	1.268	1.6	2.3	1.214		0.3	30.54	60.06	1.5	2.95	1.08	197	16	30	990	238	4.85	65	1.9	2.51	1.35	0.86	62	64	90	1.75	342	8.8	1	2	150	720	199	839.4	4418	3
16	2	LowCa	Con	Post_Meal	18	154.6	47.8	49.01	71.2	23.7	10874	34958	2272	1.268	1.6	2.3	1.214		0.3	30.54	60.06	1.5	2.95	1.08	197	16	30	990	238	4.85	65	1.9	2.51	1.35	0.86	62	64	90	1.75	342	8.8	1	2	150	720	199	839.4	4418	2
16	2	LowCa	Con	Pre_Ex	18	154.6	47.8	49.01	71.2	23.7	10874	34958	2272	1.268	1.6	2.3	1.214		0.3	30.54	60.06	1.5	2.95	1.08	197	16	30	990	238	4.85	65	1.9	2.51	1.35	0.86	62	64	90	1.75	342	8.8	1	2	150	720	199	839.4	4418	1
16	2	LowCa	Con	Ex	18	154.6	47.8	49.01	71.2	23.7	10874	34958	2272	1.268	1.6	2.3	1.214		0.3	30.54	60.06	1.5	2.95	1.08	197	16	30	990	238	4.85	65	1.9	2.51	1.35	0.86	62	64	90	1.75	342	8.8	1	2	150	720	199	839.4	4418	3
16	2	LowCa	Con	Post_ex	18	154.6	47.8	49.01	71.2	23.7	10874	34958	2272	1.268	1.6	2.3	1.214		0.3	30.54	60.06	1.5	2.95	1.08	197	16	30	990	238	4.85	65	1.9	2.51	1.35	0.86	62	64	90	1.75	342	8.8	1	2	150	720	199	839.4	4418	4
16	2	LowCa	Con	PostRE1	18	154.6	47.8	49.01	71.2	23.7	10874	34958	2272	1.268	1.6	2.3	1.214		0.3	30.54	60.06	1.5	2.95	1.08	197	16	30	990	238	4.85	65	1.9	2.51	1.35	0.86	62	64	90	1.75	342	8.8	1	2	150	720	199	839.4	4418
16	2	LowCa	Con	PostRE2	18	154.6	47.8	49.01	71.2	23.7	10874	34958	2272	1.268	1.6	2.3	1.214		0.3	30.54	60.06	1.5	2.95	1.08	197	16	30	990	238	4.85	65	1.9	2.51	1.35	0.86	62	64	90	1.75	342	8.8	1	2	150	720	199	839.4	4418	3
16	2	LowCa	Con	PostRE3	18	154.6	47.8	49.01	71.2	23.7	10874	34958	2272	1.268	1.6	2.3	1.214		0.3	30.54	60.06	1.5	2.95	1.08	197	16	30	990	238	4.85	65	1.9	2.51	1.35	0.86	62	64	90	1.75	342	8.8	1	2	150	720	199	839.4	4418	2
17	1	LowCa	Con	Pre_trial	29	167	50	49.45	74.4	19.9	9587	38609	1893	0.832	-1.6	-1	1.017	-1.4	-1	31.9	63.6	1.58	3.15	1.1	199	19	0	1140	258	5.22	82	3	2.42	1.22	0.87	49	75	90	1.07	113	1	2	1	155	744	229	881.4	4639	1
17	1	LowCa	Con	Post_Meal	29	167	50	49.45	74.4	19.9	9587	38609	1893	0.832	-1.6	-1	1.017	-1.4	-1	31.9	63.6	1.58	3.15	1.1	199	19	0	1140	258	5.22	82	3	2.42	1.22	0.87	49	75	90	1.07	113	1	2	1	155	744	229	881.4	4639	3
17	1	LowCa	Con	Pre_Ex	29	167	50	49.45	74.4	19.9	9587	38609	1893	0.832	-1.6	-1	1.017	-1.4	-1	31.9	63.6	1.58	3.15	1.1	199	19	0	1140	258	5.22	82	3	2.42	1.22	0.87	49	75	90	1.07	113	1	2	1	155	744	229	881.4	4639	3
17	1	LowCa	Con	Ex	29	167	50	49.45	74.4	19.9	9587	38609	1893	0.832	-1.6	-1	1.017	-1.4	-1	31.9	63.6	1.58	3.15	1.1	199	19	0	1140	258	5.22	82	3	2.42	1.22	0.87	49	75	90	1.07	113	1	2	1	155	744	229	881.4	4639	2
17	1	LowCa	Con	Post_ex	29	167	50	49.45	74.4	19.9	9587	38609	1893	0.832	-1.6	-1	1.017	-1.4	-1	31.9	63.6	1.58	3.15	1.1	199	19	0	1140	258	5.22	82	3	2.42	1.22	0.87	49	75	90	1.07	113	1	2	1	155	744	229	881.4	4639	3
17	1	LowCa	Con	PostRE1	29	167	50	49.45	74.4	19.9	9587	38609	1893	0.832	-1.6	-1	1.017	-1.4	-1	31.9	63.6	1.58	3.15	1.1	199	19	0	1140	258	5.22	82	3	2.42	1.22	0.87	49	75	90	1.07	113	1	2	1	155	744	229	881.4	4639	2
17	1	LowCa	Con	PostRE2	29	167	50	49.45	74.4	19.9	9587	38609	1893	0.832	-1.6	-1	1.017	-1.4	-1	31.9	63.6	1.58	3.15	1.1	199	19	0	1140	258	5.22	82	3	2.42	1.22	0.87	49	75	90	1.07	113	1	2	1	155	744	229	881.4	4639	1
17	1	LowCa	Con	PostRE3	29	167	50	49.45	74.4	19.9	9587	38609	1893	0.832	-1.6	-1	1.017	-1.4	-1	31.9	63.6	1.58	3.15	1.1	199	19	0	1140	258	5.22	82	3	2.42	1.22	0.87	49	75	90	1.07	113	1	2	1	155	744	229	881.4	4639
17	2	Ca	CWI	Pre_trial	29	167	50	49.45	74.4	19.9	9587	38609	1893	0.832	-1.6	-1	1.017	-1.4	-1	31.9	63.6	1.58	3.15	1.1	199	19	0	1140	258	5.22	82	3	2.42	1.22	0.87	49	75	90	1.07	113	1	2	1	165	792	207	916.2	4822	2
17	2	Ca	CWI	Post_Meal	29	167	50	49.45	74.4	19.9	9587	38609	1893	0.832	-1.6	-1	1.017	-1.4	-1	31.9	63.6	1.58	3.15	1.1	199	19	0	1140	258	5.22	82	3	2.42	1.22	0.87	49	75	90	1.07	113	1	2	1	165	792	207	916.2	4822	4
17	2	Ca	CWI	Pre_Ex	29	167	50	49.45	74.4	19.9	9587	38609	1893	0.832	-1.6	-1	1.017	-1.4	-1	31.9	63.6	1.58	3.15	1.1	199	19	0	1140	258	5.22	82	3	2.42	1.22	0.87	49	75	90	1.07	113	1	2	1	165	792	207	916.2	4822	4
17	2	Ca	CWI	Ex	29	167	50	49.45	74.4	19.9	9587	38609	1893	0.832	-1.6	-1	1.017	-1.4	-1	31.9	63.6	1.58	3.15	1.1	199	19	0	1140	258	5.22	82	3	2.42	1.22	0.87	49	75	90	1.07	113	1	2	1	165	792	207	916.2	4822	3
17	2	Ca	CWI	Post_ex	29	167	50	49.45	74.4	19.9	9587	38609	1893	0.832	-1.6	-1	1.017	-1.4	-1	31.9	63.6	1.58	3.15	1.1	199	19	0	1140	258	5.22	82	3	2.42	1.22	0.87	49	75	90	1.07	113	1	2	1	165	792	207	916.2	4822	2
17	2	Ca	CWI	PostRE1	29	167	50	49.45	74.4	19.9	9587	38609	1893	0.832	-1.6	-1	1.017	-1.4	-1	31.9	63.6	1.58	3.15	1.1	199	19	0	1140	258	5.22	82	3	2.42	1.22	0.87	49	75	90	1.07	113	1	2	1	165	792	207	916.2	4822	2
17	2	Ca	CWI	PostRE2	29	167	50	49.45	74.4	19.9	9587	38609	1893	0.832	-1.6	-1	1.017	-1.4	-1	31.9	63.6	1.58	3.15	1.1	199	19	0	1140	258	5.22	82	3	2.42	1.22	0.87	49	75	90	1.07	113	1	2	1	165	792	207	916.2	4822	2
17	2	Ca	CWI	PostRE3	29	167	50	49.45	74.4	19.9	9587	38609	1893	0.832	-1.6	-1	1.017	-1.4	-1	31.9	63.6	1.58	3.15	1.1	199	19	0	1140	258	5.22	82	3	2.42	1.22	0.87	49	75	90	1.07	113	1	2	1	165	792	207	916.2	4822	2
18	1	LowCa	CWI	Pre_trial	26	165.6	53.12	53.46	52.4	17.7	9029	42104	2244	0.992	-0.4	0.1	1.123	-0.6	-0.3	31.33	61.87	1.67	3.3	1.01	190	19	0	1140	258	4.83	93	1.6	2.57	1.24	0.79	53	72	90	1.25	104	1	2	1	158	758.4	234	898.8	4731	2
18	1	LowCa	CWI	Post_Meal	26	165.6	53.12	53.46	52.4	17.7	9029	42104	2244	0.992	-0.4	0.1	1.123	-0.6	-0.3	31.33	61.87	1.67	3.3	1.01	190	19	0	1140	258	4.83	93	1.6	2.57	1.24	0.79	53	72	90	1.25	104	1	2	1	158	758.4	234	898.8	4731	2
18	1	LowCa	CWI	Pre_Ex	26	165.6	53.12	53.46	52.4	17.7	9029	42104	2244	0.992	-0.4	0.1	1.123	-0.6	-0.3	31.33	61.87	1.67	3.3	1.01	190	19	0	1140	258	4.83	93	1.6	2.57	1.24	0.79	53	72	90	1.25	104	1	2	1	158	758.4	234	898.8	4731	1
18	1	LowCa	CWI	Ex	26	165.6	53.12	53.46	52.4	17.7	9029	42104	2244	0.992	-0.4	0.1	1.123	-0.6	-0.3	31.33	61.87	1.67	3.3	1.01	190	19	0	1140	258	4.83	93	1.6	2.57	1.24	0.79	53	72	90	1.25	104	1	2	1	158	758.4	234	898.8	4731	3
18	1	LowCa	CWI	Post_ex	26	165.6	53.12	53.46	52.4	17.7	9029	42104	2244	0.992	-0.4	0.1	1.123	-0.6	-0.3	31.33	61.87	1.67	3.3	1.01	190	19	0	1140	258	4.83	93	1.6	2.57	1.24	0.79	53	72	90	1.25	104	1	2	1	158	758.4	234	898.8	4731	3
18	1	LowCa	CWI	PostRE1	26	165.6	53.12	53.46	52.4	17.7	9029	42104	2244	0.992	-0.4	0.1	1.123	-0.6	-0.3	31.33	61.87	1.67	3.3	1.01	190	19	0	1140	258	4.83	93	1.6	2.57	1.24	0.79	53	72	90	1.25	104	1	2	1	158	758.4	234	898.8	4731	1
18	1	LowCa	CWI	PostRE2	26	165.6	53.12	53.46	52.4	17.7	9029	42104	2244	0.992	-0.4	0.1	1.123	-0.6	-0.3	31.33	61.87	1.67	3.3	1.01	190	19	0	1140	258	4.83	93	1.6	2.57	1.24	0.79	53	72	90	1.25	104	1	2	1	158	758.4	234	898.8	4731	2
18	1	LowCa	CWI	PostRE3	26	165.6	53.12	53.46	52.4	17.7	9029	42104	2244	0.992	-0.4	0.1	1.123	-0.6	-0.3	31.33	61.87	1.67	3.3	1.01	190	19	0	1140	258	4.83	93	1.6	2.57	1.24	0.79	53	72	90	1.25	104	1	2	1	158	758.4	234	898.8	4731	3
18	2	Ca	Con	Pre_trial	26	165.6	53.12	53.46	52.4	17.7	9029	42104	2244	0.992	-0.4	0.1	1.123	-0.6	-0.3	31.33	61.87	1.67	3.3	1.01	190	19	0	1140	258	4.83	93	1.6	2.57	1.24	0.79	53	72	90	1.25	104	1	2	1	160	768	236	909.6	4787	2
18	2	Ca	Con	Post_Meal	26	165.6	53.12	53.46	52.4	17.7	9029	42104	2244	0.992	-0.4	0.1	1.123	-0.6	-0.3	31.33	61.87	1.67	3.3	1.01	190	19	0	1140	258	4.83	93	1.6	2.57	1.24	0.79	53	72	90	1.25	104	1	2	1	160	768	236	909.6	4787	4
18	2	Ca	Con	Pre_Ex	26	165.6	53.12	53.46	52.4	17.7	9029	42104	2244	0.992	-0.4	0.1	1.123	-0.6	-0.3	31.33	61.87	1.67	3.3	1.01	190	19	0	1140	258	4.83	93	1.6	2.57	1.24	0.79	53	72	90	1.25	104	1	2	1	160	768	236	909.6	4787	2
18	2	Ca	Con	Ex	26	165.6	53.12	53.46	52.4	17.7	9029	42104	2244	0.992	-0.4	0.1	1.123	-0.6	-0.3	31.33	61.87	1.67	3.3	1.01	190	19	0	1140	258	4.83	93	1.6	2.57	1.24	0.79	53	72	90	1.25	104	1	2	1	160	768	236	909.6	4787	2
18	2	Ca	Con	Post_ex	26	165.6	53.12	53.46	52.4	17.7	9029	42104	2244	0.992	-0.4	0.1	1.123	-0.6	-0.3	31.33	61.87	1.67	3.3	1.01	190	19	0	1140	258	4.83	93	1.6	2.57	1.24	0.79	53	72	90	1.25	104	1	2	1	160	768	236	909.6	4787	2
18	2	Ca	Con	PostRE1	26	165.6	53.12	53.46	52.4	17.7	9029	42104	2244	0.992	-0.4	0.1	1.123	-0.6	-0.3	31.33	61.87	1.67	3.3	1.01	190	19	0	1140	258	4.83	93	1.6	2.57	1.24	0.79	53	72	90	1.25	104	1	2	1	160	768	236	909.6	4787	2
18	2	Ca	Con	PostRE2	26	165.6	53.12	53.46	52.4	17.7	9029	42104	2244	0.992	-0.4	0.1	1.123	-0.6	-0.3	31.33	61.87	1.67	3.3	1.01	190	19	0	1140	258	4.83	93	1.6	2.57	1.24	0.79	53	72	90	1.25	104	1	2	1	160	768	236	909.6	4787	2
18	2	Ca	Con	PostRE3	26	165.6	53.12	53.46	52.4	17.7	9029	42104	2244	0.992	-0.4	0.1	1.123	-0.6	-0.3	31.33	61.87	1.67	3.3	1.01	190	19	0	1140	258	4.83	93	1.6	2.57	1.24	0.79	53	72	90	1.25	104	1	2	1	160	768	236	909.6	4787	2
19	1	Ca	Con	Pre_trial	22	175.7	67.34	67.74	91.8	20.8	13458	51394	2786	1.052	0	-0.1	1.118	-0.7	-0.7	24.25	48.48	1.64	3.28	1.29?	167	23	0	1380	292	4.31	118	3.3	2.43	1.08	0.78	53	73	90	1.2	124	1	1	1	175	840	276	1005.6	5293	1
19	1	Ca	Con	Post_Meal	22	175.7	67.34	67.74	91.8	20.8	13458	51394	2786	1.052	0	-0.1	1.118	-0.7	-0.7	24.25	48.48	1.64	3.28	1.29?	167	23	0	1380	292	4.31	118	3.3	2.43	1.08	0.78	53	73	90	1.2	124	1	1	1	175	840	276	1005.6	5293	5
19	1	Ca	Con	Pre_Ex	22	175.7	67.34	67.74	91.8	20.8	13458	51394	2786	1.052	0	-0.1	1.118	-0.7	-0.7	24.25	48.48	1.64	3.28	1.29?	167	23	0	1380	292	4.31	118	3.3	2.43	1.08	0.78	53	73	90	1.2	124	1	1	1	175	840	276	1005.6	5293	3
19	1	Ca	Con	Ex	22	175.7	67.34	67.74	91.8	20.8	13458	51394	2786	1.052	0	-0.1	1.118	-0.7	-0.7	24.25	48.48	1.64	3.28	1.29?	167	23	0	1380	292	4.31	118	3.3	2.43	1.08	0.78	53	73	90	1.2	124	1	1	1	175	840	276	1005.6	5293	3
19	1	Ca	Con	Post_ex	22	175.7	67.34	67.74	91.8	20.8	13458	51394	2786	1.052	0	-0.1	1.118	-0.7	-0.7	24.25	48.48	1.64	3.28	1.29?	167	23	0	1380	292	4.31	118	3.3	2.43	1.08	0.78	53	73	90	1.2	124	1	1	1	175	840	276	1005.6	5293	5
19	1	Ca	Con	PostRE1	22	175.7	67.34	67.74	91.8	20.8	13458	51394	2786	1.052	0	-0.1	1.118	-0.7	-0.7	24.25	48.48	1.64	3.28	1.29?	167	23	0	1380	292	4.31	118	3.3	2.43	1.08	0.78	53	73	90	1.2	124	1	1	1	175	840	276	1005.6	5293	4
19	1	Ca	Con	PostRE2	22	175.7	67.34	67.74	91.8	20.8	13458	51394	2786	1.052	0	-0.1	1.118	-0.7	-0.7	24.25	48.48	1.64	3.28	1.29?	167	23	0	1380	292	4.31	118	3.3	2.43	1.08	0.78	53	73	90	1.2	124	1	1	1	175	840	276	1005.6	5293	2
19	1	Ca	Con	PostRE3	22	175.7	67.34	67.74	91.8	20.8	13458	51394	2786	1.052	0	-0.1	1.118	-0.7	-0.7	24.25	48.48	1.64	3.28	1.29?	167	23	0	1380	292	4.31	118	3.3	2.43	1.08	0.78	53	73	90	1.2	124	1	1	1	175	840	276	1005.6	5293	2
19	2	LowCa	CWI	Pre_trial	22	175.7	67.34	67.74	91.8	20.8	13458	51394	2786	1.052	0	-0.1	1.118	-0.7	-0.7	24.25	48.48	1.64	3.28	1.29?	167	23	0	1380	292	4.31	118	3.3	2.43	1.08	0.78	53	73	90	1.2	124	1	1	1	175	840	273	1003.8	5283	3
19	2	LowCa	CWI	Post_Meal	22	175.7	67.34	67.74	91.8	20.8	13458	51394	2786	1.052	0	-0.1	1.118	-0.7	-0.7	24.25	48.48	1.64	3.28	1.29?	167	23	0	1380	292	4.31	118	3.3	2.43	1.08	0.78	53	73	90	1.2	124	1	1	1	175	840	273	1003.8	5283	3
19	2	LowCa	CWI	Pre_Ex	22	175.7	67.34	67.74	91.8	20.8	13458	51394	2786	1.052	0	-0.1	1.118	-0.7	-0.7	24.25	48.48	1.64	3.28	1.29?	167	23	0	1380	292	4.31	118	3.3	2.43	1.08	0.78	53	73	90	1.2	124	1	1	1	175	840	273	1003.8	5283	2
19	2	LowCa	CWI	Ex	22	175.7	67.34	67.74	91.8	20.8	13458	51394	2786	1.052	0	-0.1	1.118	-0.7	-0.7	24.25	48.48	1.64	3.28	1.29?	167	23	0	1380	292	4.31	118	3.3	2.43	1.08	0.78	53	73	90	1.2	124	1	1	1	175	840	273	1003.8	5283	3
19	2	LowCa	CWI	Post_ex	22	175.7	67.34	67.74	91.8	20.8	13458	51394	2786	1.052	0	-0.1	1.118	-0.7	-0.7	24.25	48.48	1.64	3.28	1.29?	167	23	0	1380	292	4.31	118	3.3	2.43	1.08	0.78	53	73	90	1.2	124	1	1	1	175	840	273	1003.8	5283	3
19	2	LowCa	CWI	PostRE1	22	175.7	67.34	67.74	91.8	20.8	13458	51394	2786	1.052	0	-0.1	1.118	-0.7	-0.7	24.25	48.48	1.64	3.28	1.29?	167	23	0	1380	292	4.31	118	3.3	2.43	1.08	0.78	53	73	90	1.2	124	1	1	1	175	840	273	1003.8	5283	2
19	2	LowCa	CWI	PostRE2	22	175.7	67.34	67.74	91.8	20.8	13458	51394	2786	1.052	0	-0.1	1.118	-0.7	-0.7	24.25	48.48	1.64	3.28	1.29?	167	23	0	1380	292	4.31	118	3.3	2.43	1.08	0.78	53	73	90	1.2	124	1	1	1	175	840	273	1003.8	5283	2
19	2	LowCa	CWI	PostRE3	22	175.7	67.34	67.74	91.8	20.8	13458	51394	2786	1.052	0	-0.1	1.118	-0.7	-0.7	24.25	48.48	1.64	3.28	1.29?	167	23	0	1380	292	4.31	118	3.3	2.43	1.08	0.78	53	73	90	1.2	124	1	1	1	175	840	273	1003.8	5283	2
20	1	Ca	CWI	Pre_trial	18	169.8	70.56	71.15	86	23.1	15733	52233	2867	1.083	0.2	0	1.256		0.6	28.56	56.93	2.03	4.05	1.01	191	24	30	1470	304	4.28	80	2	2.54	1.25	0.89	53	72	90	1.63	1125	1	1	3	184	883.2	281	1051.8	5536	4
20	1	Ca	CWI	Post_Meal	18	169.8	70.56	71.15	86	23.1	15733	52233	2867	1.083	0.2	0	1.256		0.6	28.56	56.93	2.03	4.05	1.01	191	24	30	1470	304	4.28	80	2	2.54	1.25	0.89	53	72	90	1.63	1125	1	1	3	184	883.2	281	1051.8	5536	4
20	1	Ca	CWI	Pre_Ex	18	169.8	70.56	71.15	86	23.1	15733	52233	2867	1.083	0.2	0	1.256		0.6	28.56	56.93	2.03	4.05	1.01	191	24	30	1470	304	4.28	80	2	2.54	1.25	0.89	53	72	90	1.63	1125	1	1	3	184	883.2	281	1051.8	5536	2
20	1	Ca	CWI	Ex	18	169.8	70.56	71.15	86	23.1	15733	52233	2867	1.083	0.2	0	1.256		0.6	28.56	56.93	2.03	4.05	1.01	191	24	30	1470	304	4.28	80	2	2.54	1.25	0.89	53	72	90	1.63	1125	1	1	3	184	883.2	281	1051.8	5536	2
20	1	Ca	CWI	Post_ex	18	169.8	70.56	71.15	86	23.1	15733	52233	2867	1.083	0.2	0	1.256		0.6	28.56	56.93	2.03	4.05	1.01	191	24	30	1470	304	4.28	80	2	2.54	1.25	0.89	53	72	90	1.63	1125	1	1	3	184	883.2	281	1051.8	5536	3
20	1	Ca	CWI	PostRE1	18	169.8	70.56	71.15	86	23.1	15733	52233	2867	1.083	0.2	0	1.256		0.6	28.56	56.93	2.03	4.05	1.01	191	24	30	1470	304	4.28	80	2	2.54	1.25	0.89	53	72	90	1.63	1125	1	1	3	184	883.2	281	1051.8	5536	4
20	1	Ca	CWI	PostRE2	18	169.8	70.56	71.15	86	23.1	15733	52233	2867	1.083	0.2	0	1.256		0.6	28.56	56.93	2.03	4.05	1.01	191	24	30	1470	304	4.28	80	2	2.54	1.25	0.89	53	72	90	1.63	1125	1	1	3	184	883.2	281	1051.8	5536	1
20	1	Ca	CWI	PostRE3	18	169.8	70.56	71.15	86	23.1	15733	52233	2867	1.083	0.2	0	1.256		0.6	28.56	56.93	2.03	4.05	1.01	191	24	30	1470	304	4.28	80	2	2.54	1.25	0.89	53	72	90	1.63	1125	1	1	3	184	883.2	281	1051.8	5536	2
20	2	LowCa	Con	Pre_trial	18	169.8	70.56	71.15	86	23.1	15733	52233	2867	1.083	0.2	0	1.256		0.6	28.56	56.93	2.03	4.05	1.01	191	24	30	1470	304	4.28	80	2	2.54	1.25	0.89	53	72	90	1.63	1125	1	1	3	188	902.4	278	1069.2	5627	4
20	2	LowCa	Con	Post_Meal	18	169.8	70.56	71.15	86	23.1	15733	52233	2867	1.083	0.2	0	1.256		0.6	28.56	56.93	2.03	4.05	1.01	191	24	30	1470	304	4.28	80	2	2.54	1.25	0.89	53	72	90	1.63	1125	1	1	3	188	902.4	278	1069.2	5627	3
20	2	LowCa	Con	Pre_Ex	18	169.8	70.56	71.15	86	23.1	15733	52233	2867	1.083	0.2	0	1.256		0.6	28.56	56.93	2.03	4.05	1.01	191	24	30	1470	304	4.28	80	2	2.54	1.25	0.89	53	72	90	1.63	1125	1	1	3	188	902.4	278	1069.2	5627	3
20	2	LowCa	Con	Ex	18	169.8	70.56	71.15	86	23.1	15733	52233	2867	1.083	0.2	0	1.256		0.6	28.56	56.93	2.03	4.05	1.01	191	24	30	1470	304	4.28	80	2	2.54	1.25	0.89	53	72	90	1.63	1125	1	1	3	188	902.4	278	1069.2	5627	4
20	2	LowCa	Con	Post_ex	18	169.8	70.56	71.15	86	23.1	15733	52233	2867	1.083	0.2	0	1.256		0.6	28.56	56.93	2.03	4.05	1.01	191	24	30	1470	304	4.28	80	2	2.54	1.25	0.89	53	72	90	1.63	1125	1	1	3	188	902.4	278	1069.2	5627	4
20	2	LowCa	Con	PostRE1	18	169.8	70.56	71.15	86	23.1	15733	52233	2867	1.083	0.2	0	1.256		0.6	28.56	56.93	2.03	4.05	1.01	191	24	30	1470	304	4.28	80	2	2.54	1.25	0.89	53	72	90	1.63	1125	1	1	3	188	902.4	278	1069.2	5627	4
20	2	LowCa	Con	PostRE2	18	169.8	70.56	71.15	86	23.1	15733	52233	2867	1.083	0.2	0	1.256		0.6	28.56	56.93	2.03	4.05	1.01	191	24	30	1470	304	4.28	80	2	2.54	1.25	0.89	53	72	90	1.63	1125	1	1	3	188	902.4	278	1069.2	5627	3
20	2	LowCa	Con	PostRE3	18	169.8	70.56	71.15	86	23.1	15733	52233	2867	1.083	0.2	0	1.256		0.6	28.56	56.93	2.03	4.05	1.01	191	24	30	1470	304	4.28	80	2	2.54	1.25	0.89	53	72	90	1.63	1125	1	1	3	188	902.4	278	1069.2	5627	3
21	1	LowCa	Con	Pre_trial	21	178.4	71.6	71.77	96.1	28.9	19767	48750	3269	1.137	0.6	0.4	1.29	0.6	0.4	27.28	54.11	1.96	3.89	1.02	167	22	30	1350	288	4.01	86	2	2.51	1	0.88	38	76	90	1.16	85	1.7	3	5	169	811.2	257	965.4	5081	2
21	1	LowCa	Con	Post_Meal	21	178.4	71.6	71.77	96.1	28.9	19767	48750	3269	1.137	0.6	0.4	1.29	0.6	0.4	27.28	54.11	1.96	3.89	1.02	167	22	30	1350	288	4.01	86	2	2.51	1	0.88	38	76	90	1.16	85	1.7	3	5	169	811.2	257	965.4	5081	2
21	1	LowCa	Con	Pre_Ex	21	178.4	71.6	71.77	96.1	28.9	19767	48750	3269	1.137	0.6	0.4	1.29	0.6	0.4	27.28	54.11	1.96	3.89	1.02	167	22	30	1350	288	4.01	86	2	2.51	1	0.88	38	76	90	1.16	85	1.7	3	5	169	811.2	257	965.4	5081	2
21	1	LowCa	Con	Ex	21	178.4	71.6	71.77	96.1	28.9	19767	48750	3269	1.137	0.6	0.4	1.29	0.6	0.4	27.28	54.11	1.96	3.89	1.02	167	22	30	1350	288	4.01	86	2	2.51	1	0.88	38	76	90	1.16	85	1.7	3	5	169	811.2	257	965.4	5081	3
21	1	LowCa	Con	Post_ex	21	178.4	71.6	71.77	96.1	28.9	19767	48750	3269	1.137	0.6	0.4	1.29	0.6	0.4	27.28	54.11	1.96	3.89	1.02	167	22	30	1350	288	4.01	86	2	2.51	1	0.88	38	76	90	1.16	85	1.7	3	5	169	811.2	257	965.4	5081	3
21	1	LowCa	Con	PostRE1	21	178.4	71.6	71.77	96.1	28.9	19767	48750	3269	1.137	0.6	0.4	1.29	0.6	0.4	27.28	54.11	1.96	3.89	1.02	167	22	30	1350	288	4.01	86	2	2.51	1	0.88	38	76	90	1.16	85	1.7	3	5	169	811.2	257	965.4	5081	2
21	1	LowCa	Con	PostRE2	21	178.4	71.6	71.77	96.1	28.9	19767	48750	3269	1.137	0.6	0.4	1.29	0.6	0.4	27.28	54.11	1.96	3.89	1.02	167	22	30	1350	288	4.01	86	2	2.51	1	0.88	38	76	90	1.16	85	1.7	3	5	169	811.2	257	965.4	5081	2
21	1	LowCa	Con	PostRE3	21	178.4	71.6	71.77	96.1	28.9	19767	48750	3269	1.137	0.6	0.4	1.29	0.6	0.4	27.28	54.11	1.96	3.89	1.02	167	22	30	1350	288	4.01	86	2	2.51	1	0.88	38	76	90	1.16	85	1.7	3	5	169	811.2	257	965.4	5081
21	2	Ca	CWI	Pre_trial	21	178.4	71.6	71.77	96.1	28.9	19767	48750	3269	1.137	0.6	0.4	1.29	0.6	0.4	27.28	54.11	1.96	3.89	1.02	167	22	30	1350	288	4.01	86	2	2.51	1	0.88	38	76	90	1.16	85	1.7	3	5	167	801.6	267	961.8	5062	2
21	2	Ca	CWI	Post_Meal	21	178.4	71.6	71.77	96.1	28.9	19767	48750	3269	1.137	0.6	0.4	1.29	0.6	0.4	27.28	54.11	1.96	3.89	1.02	167	22	30	1350	288	4.01	86	2	2.51	1	0.88	38	76	90	1.16	85	1.7	3	5	167	801.6	267	961.8	5062	3
21	2	Ca	CWI	Pre_Ex	21	178.4	71.6	71.77	96.1	28.9	19767	48750	3269	1.137	0.6	0.4	1.29	0.6	0.4	27.28	54.11	1.96	3.89	1.02	167	22	30	1350	288	4.01	86	2	2.51	1	0.88	38	76	90	1.16	85	1.7	3	5	167	801.6	267	961.8	5062	2
21	2	Ca	CWI	Ex	21	178.4	71.6	71.77	96.1	28.9	19767	48750	3269	1.137	0.6	0.4	1.29	0.6	0.4	27.28	54.11	1.96	3.89	1.02	167	22	30	1350	288	4.01	86	2	2.51	1	0.88	38	76	90	1.16	85	1.7	3	5	167	801.6	267	961.8	5062	3
21	2	Ca	CWI	Post_ex	21	178.4	71.6	71.77	96.1	28.9	19767	48750	3269	1.137	0.6	0.4	1.29	0.6	0.4	27.28	54.11	1.96	3.89	1.02	167	22	30	1350	288	4.01	86	2	2.51	1	0.88	38	76	90	1.16	85	1.7	3	5	167	801.6	267	961.8	5062	3
21	2	Ca	CWI	PostRE1	21	178.4	71.6	71.77	96.1	28.9	19767	48750	3269	1.137	0.6	0.4	1.29	0.6	0.4	27.28	54.11	1.96	3.89	1.02	167	22	30	1350	288	4.01	86	2	2.51	1	0.88	38	76	90	1.16	85	1.7	3	5	167	801.6	267	961.8	5062	2
21	2	Ca	CWI	PostRE2	21	178.4	71.6	71.77	96.1	28.9	19767	48750	3269	1.137	0.6	0.4	1.29	0.6	0.4	27.28	54.11	1.96	3.89	1.02	167	22	30	1350	288	4.01	86	2	2.51	1	0.88	38	76	90	1.16	85	1.7	3	5	167	801.6	267	961.8	5062	2
21	2	Ca	CWI	PostRE3	21	178.4	71.6	71.77	96.1	28.9	19767	48750	3269	1.137	0.6	0.4	1.29	0.6	0.4	27.28	54.11	1.96	3.89	1.02	167	22	30	1350	288	4.01	86	2	2.51	1	0.88	38	76	90	1.16	85	1.7	3	5	167	801.6	267	961.8	5062	2
22	1	LowCa	CWI	Pre_trial	25	174	58.04	58.3	61.1	17.5	9818	46238	2368	0.881	-1.3	-1	1.046	-1.2	-1	32.21	63.98	1.88	3.73	1.08	190	23	0	1380	292	5	98	1.2	2.63	1.16	0.77	37	67	90	1.05	85	1	3	5	175	840	257	994.2	5233	2
22	1	LowCa	CWI	Post_Meal	25	174	58.04	58.3	61.1	17.5	9818	46238	2368	0.881	-1.3	-1	1.046	-1.2	-1	32.21	63.98	1.88	3.73	1.08	190	23	0	1380	292	5	98	1.2	2.63	1.16	0.77	37	67	90	1.05	85	1	3	5	175	840	257	994.2	5233	2
22	1	LowCa	CWI	Pre_Ex	25	174	58.04	58.3	61.1	17.5	9818	46238	2368	0.881	-1.3	-1	1.046	-1.2	-1	32.21	63.98	1.88	3.73	1.08	190	23	0	1380	292	5	98	1.2	2.63	1.16	0.77	37	67	90	1.05	85	1	3	5	175	840	257	994.2	5233	2
22	1	LowCa	CWI	Ex	25	174	58.04	58.3	61.1	17.5	9818	46238	2368	0.881	-1.3	-1	1.046	-1.2	-1	32.21	63.98	1.88	3.73	1.08	190	23	0	1380	292	5	98	1.2	2.63	1.16	0.77	37	67	90	1.05	85	1	3	5	175	840	257	994.2	5233	2
22	1	LowCa	CWI	Post_ex	25	174	58.04	58.3	61.1	17.5	9818	46238	2368	0.881	-1.3	-1	1.046	-1.2	-1	32.21	63.98	1.88	3.73	1.08	190	23	0	1380	292	5	98	1.2	2.63	1.16	0.77	37	67	90	1.05	85	1	3	5	175	840	257	994.2	5233	3
22	1	LowCa	CWI	PostRE1	25	174	58.04	58.3	61.1	17.5	9818	46238	2368	0.881	-1.3	-1	1.046	-1.2	-1	32.21	63.98	1.88	3.73	1.08	190	23	0	1380	292	5	98	1.2	2.63	1.16	0.77	37	67	90	1.05	85	1	3	5	175	840	257	994.2	5233	3
22	1	LowCa	CWI	PostRE2	25	174	58.04	58.3	61.1	17.5	9818	46238	2368	0.881	-1.3	-1	1.046	-1.2	-1	32.21	63.98	1.88	3.73	1.08	190	23	0	1380	292	5	98	1.2	2.63	1.16	0.77	37	67	90	1.05	85	1	3	5	175	840	257	994.2	5233	3
22	1	LowCa	CWI	PostRE3	25	174	58.04	58.3	61.1	17.5	9818	46238	2368	0.881	-1.3	-1	1.046	-1.2	-1	32.21	63.98	1.88	3.73	1.08	190	23	0	1380	292	5	98	1.2	2.63	1.16	0.77	37	67	90	1.05	85	1	3	5	175	840	257	994.2	5233	2
22	2	Ca	Con	Pre_trial	25	174	58.04	58.3	61.1	17.5	9818	46238	2368	0.881	-1.3	-1	1.046	-1.2	-1	32.21	63.98	1.88	3.73	1.08	190	23	0	1380	292	5	98	1.2	2.63	1.16	0.77	37	67	90	1.05	85	1	3	5	175	840	244	986.4	5192	5
22	2	Ca	Con	Post_Meal	25	174	58.04	58.3	61.1	17.5	9818	46238	2368	0.881	-1.3	-1	1.046	-1.2	-1	32.21	63.98	1.88	3.73	1.08	190	23	0	1380	292	5	98	1.2	2.63	1.16	0.77	37	67	90	1.05	85	1	3	5	175	840	244	986.4	5192	4
22	2	Ca	Con	Pre_Ex	25	174	58.04	58.3	61.1	17.5	9818	46238	2368	0.881	-1.3	-1	1.046	-1.2	-1	32.21	63.98	1.88	3.73	1.08	190	23	0	1380	292	5	98	1.2	2.63	1.16	0.77	37	67	90	1.05	85	1	3	5	175	840	244	986.4	5192	4
22	2	Ca	Con	Ex	25	174	58.04	58.3	61.1	17.5	9818	46238	2368	0.881	-1.3	-1	1.046	-1.2	-1	32.21	63.98	1.88	3.73	1.08	190	23	0	1380	292	5	98	1.2	2.63	1.16	0.77	37	67	90	1.05	85	1	3	5	175	840	244	986.4	5192	3
22	2	Ca	Con	Post_ex	25	174	58.04	58.3	61.1	17.5	9818	46238	2368	0.881	-1.3	-1	1.046	-1.2	-1	32.21	63.98	1.88	3.73	1.08	190	23	0	1380	292	5	98	1.2	2.63	1.16	0.77	37	67	90	1.05	85	1	3	5	175	840	244	986.4	5192	3
22	2	Ca	Con	PostRE1	25	174	58.04	58.3	61.1	17.5	9818	46238	2368	0.881	-1.3	-1	1.046	-1.2	-1	32.21	63.98	1.88	3.73	1.08	190	23	0	1380	292	5	98	1.2	2.63	1.16	0.77	37	67	90	1.05	85	1	3	5	175	840	244	986.4	5192	4
22	2	Ca	Con	PostRE2	25	174	58.04	58.3	61.1	17.5	9818	46238	2368	0.881	-1.3	-1	1.046	-1.2	-1	32.21	63.98	1.88	3.73	1.08	190	23	0	1380	292	5	98	1.2	2.63	1.16	0.77	37	67	90	1.05	85	1	3	5	175	840	244	986.4	5192	3
22	2	Ca	Con	PostRE3	25	174	58.04	58.3	61.1	17.5	9818	46238	2368	0.881	-1.3	-1	1.046	-1.2	-1	32.21	63.98	1.88	3.73	1.08	190	23	0	1380	292	5	98	1.2	2.63	1.16	0.77	37	67	90	1.05	85	1	3	5	175	840	244	986.4	5192	3
23	1	Ca	Con	Pre_trial	20	176.9	76.76	77.19	139.4	35	25777	47831	3033	1.114	0.5	0	1.222	0.1	-0.2	25.55	50.53	1.97	3.9	0.95	189	22	0	1320	283	3.67	108	5.3	2.46	0.98	0.82	56	90	80	1.19	85	1	3	5	171	820.8	247	969	5100	1
23	1	Ca	Con	Post_Meal	20	176.9	76.76	77.19	139.4	35	25777	47831	3033	1.114	0.5	0	1.222	0.1	-0.2	25.55	50.53	1.97	3.9	0.95	189	22	0	1320	283	3.67	108	5.3	2.46	0.98	0.82	56	90	80	1.19	85	1	3	5	171	820.8	247	969	5100	2
23	1	Ca	Con	Pre_Ex	20	176.9	76.76	77.19	139.4	35	25777	47831	3033	1.114	0.5	0	1.222	0.1	-0.2	25.55	50.53	1.97	3.9	0.95	189	22	0	1320	283	3.67	108	5.3	2.46	0.98	0.82	56	90	80	1.19	85	1	3	5	171	820.8	247	969	5100	2
23	1	Ca	Con	Ex	20	176.9	76.76	77.19	139.4	35	25777	47831	3033	1.114	0.5	0	1.222	0.1	-0.2	25.55	50.53	1.97	3.9	0.95	189	22	0	1320	283	3.67	108	5.3	2.46	0.98	0.82	56	90	80	1.19	85	1	3	5	171	820.8	247	969	5100	3
23	1	Ca	Con	Post_ex	20	176.9	76.76	77.19	139.4	35	25777	47831	3033	1.114	0.5	0	1.222	0.1	-0.2	25.55	50.53	1.97	3.9	0.95	189	22	0	1320	283	3.67	108	5.3	2.46	0.98	0.82	56	90	80	1.19	85	1	3	5	171	820.8	247	969	5100	4
23	1	Ca	Con	PostRE1	20	176.9	76.76	77.19	139.4	35	25777	47831	3033	1.114	0.5	0	1.222	0.1	-0.2	25.55	50.53	1.97	3.9	0.95	189	22	0	1320	283	3.67	108	5.3	2.46	0.98	0.82	56	90	80	1.19	85	1	3	5	171	820.8	247	969	5100	2
23	1	Ca	Con	PostRE2	20	176.9	76.76	77.19	139.4	35	25777	47831	3033	1.114	0.5	0	1.222	0.1	-0.2	25.55	50.53	1.97	3.9	0.95	189	22	0	1320	283	3.67	108	5.3	2.46	0.98	0.82	56	90	80	1.19	85	1	3	5	171	820.8	247	969	5100	1
23	1	Ca	Con	PostRE3	20	176.9	76.76	77.19	139.4	35	25777	47831	3033	1.114	0.5	0	1.222	0.1	-0.2	25.55	50.53	1.97	3.9	0.95	189	22	0	1320	283	3.67	108	5.3	2.46	0.98	0.82	56	90	80	1.19	85	1	3	5	171	820.8	247	969	5100	1
23	2	LowCa	CWI	Pre_trial	20	176.9	76.76	77.19	139.4	35	25777	47831	3033	1.114	0.5	0	1.222	0.1	-0.2	25.55	50.53	1.97	3.9	0.95	189	22	0	1320	283	3.67	108	5.3	2.46	0.98	0.82	56	90	80	1.19	85	1	3	5	172	825.6	262	982.8	5173	2
23	2	LowCa	CWI	Post_Meal	20	176.9	76.76	77.19	139.4	35	25777	47831	3033	1.114	0.5	0	1.222	0.1	-0.2	25.55	50.53	1.97	3.9	0.95	189	22	0	1320	283	3.67	108	5.3	2.46	0.98	0.82	56	90	80	1.19	85	1	3	5	172	825.6	262	982.8	5173	1
23	2	LowCa	CWI	Pre_Ex	20	176.9	76.76	77.19	139.4	35	25777	47831	3033	1.114	0.5	0	1.222	0.1	-0.2	25.55	50.53	1.97	3.9	0.95	189	22	0	1320	283	3.67	108	5.3	2.46	0.98	0.82	56	90	80	1.19	85	1	3	5	172	825.6	262	982.8	5173	1
23	2	LowCa	CWI	Ex	20	176.9	76.76	77.19	139.4	35	25777	47831	3033	1.114	0.5	0	1.222	0.1	-0.2	25.55	50.53	1.97	3.9	0.95	189	22	0	1320	283	3.67	108	5.3	2.46	0.98	0.82	56	90	80	1.19	85	1	3	5	172	825.6	262	982.8	5173	2
23	2	LowCa	CWI	Post_ex	20	176.9	76.76	77.19	139.4	35	25777	47831	3033	1.114	0.5	0	1.222	0.1	-0.2	25.55	50.53	1.97	3.9	0.95	189	22	0	1320	283	3.67	108	5.3	2.46	0.98	0.82	56	90	80	1.19	85	1	3	5	172	825.6	262	982.8	5173	4
23	2	LowCa	CWI	PostRE1	20	176.9	76.76	77.19	139.4	35	25777	47831	3033	1.114	0.5	0	1.222	0.1	-0.2	25.55	50.53	1.97	3.9	0.95	189	22	0	1320	283	3.67	108	5.3	2.46	0.98	0.82	56	90	80	1.19	85	1	3	5	172	825.6	262	982.8	5173	1
23	2	LowCa	CWI	PostRE2	20	176.9	76.76	77.19	139.4	35	25777	47831	3033	1.114	0.5	0	1.222	0.1	-0.2	25.55	50.53	1.97	3.9	0.95	189	22	0	1320	283	3.67	108	5.3	2.46	0.98	0.82	56	90	80	1.19	85	1	3	5	172	825.6	262	982.8	5173	1
23	2	LowCa	CWI	PostRE3	20	176.9	76.76	77.19	139.4	35	25777	47831	3033	1.114	0.5	0	1.222	0.1	-0.2	25.55	50.53	1.97	3.9	0.95	189	22	0	1320	283	3.67	108	5.3	2.46	0.98	0.82	56	90	80	1.19	85	1	3	5	172	825.6	262	982.8	5173	1
24	1	Ca	CWI	Pre_trial	31	166.8	54.78	55.46	52.1	11.1	5853	46940	2633	1.19	1	1.5	1.329	0.9	1.2	32.23	63.36	1.78	3.51	1.14?	182	25	30	1530	313	5.63	55	3.8	2.45	1.01	0.73	45	70	90	0.71	573	34	1	2	188	902.4	244	1048.8	5520	2
24	1	Ca	CWI	Post_Meal	31	166.8	54.78	55.46	52.1	11.1	5853	46940	2633	1.19	1	1.5	1.329	0.9	1.2	32.23	63.36	1.78	3.51	1.14?	182	25	30	1530	313	5.63	55	3.8	2.45	1.01	0.73	45	70	90	0.71	573	34	1	2	188	902.4	244	1048.8	5520	2
24	1	Ca	CWI	Pre_Ex	31	166.8	54.78	55.46	52.1	11.1	5853	46940	2633	1.19	1	1.5	1.329	0.9	1.2	32.23	63.36	1.78	3.51	1.14?	182	25	30	1530	313	5.63	55	3.8	2.45	1.01	0.73	45	70	90	0.71	573	34	1	2	188	902.4	244	1048.8	5520	1
24	1	Ca	CWI	Ex	31	166.8	54.78	55.46	52.1	11.1	5853	46940	2633	1.19	1	1.5	1.329	0.9	1.2	32.23	63.36	1.78	3.51	1.14?	182	25	30	1530	313	5.63	55	3.8	2.45	1.01	0.73	45	70	90	0.71	573	34	1	2	188	902.4	244	1048.8	5520	2
24	1	Ca	CWI	Post_ex	31	166.8	54.78	55.46	52.1	11.1	5853	46940	2633	1.19	1	1.5	1.329	0.9	1.2	32.23	63.36	1.78	3.51	1.14?	182	25	30	1530	313	5.63	55	3.8	2.45	1.01	0.73	45	70	90	0.71	573	34	1	2	188	902.4	244	1048.8	5520	2
24	1	Ca	CWI	PostRE1	31	166.8	54.78	55.46	52.1	11.1	5853	46940	2633	1.19	1	1.5	1.329	0.9	1.2	32.23	63.36	1.78	3.51	1.14?	182	25	30	1530	313	5.63	55	3.8	2.45	1.01	0.73	45	70	90	0.71	573	34	1	2	188	902.4	244	1048.8	5520	2
24	1	Ca	CWI	PostRE2	31	166.8	54.78	55.46	52.1	11.1	5853	46940	2633	1.19	1	1.5	1.329	0.9	1.2	32.23	63.36	1.78	3.51	1.14?	182	25	30	1530	313	5.63	55	3.8	2.45	1.01	0.73	45	70	90	0.71	573	34	1	2	188	902.4	244	1048.8	5520	2
24	1	Ca	CWI	PostRE3	31	166.8	54.78	55.46	52.1	11.1	5853	46940	2633	1.19	1	1.5	1.329	0.9	1.2	32.23	63.36	1.78	3.51	1.14?	182	25	30	1530	313	5.63	55	3.8	2.45	1.01	0.73	45	70	90	0.71	573	34	1	2	188	902.4	244	1048.8	5520	2
24	2	LowCa	Con	Pre_trial	31	166.8	54.78	55.46	52.1	11.1	5853	46940	2633	1.19	1	1.5	1.329	0.9	1.2	32.23	63.36	1.78	3.51	1.14?	182	25	30	1530	313	5.63	55	3.8	2.45	1.01	0.73	45	70	90	0.71	573	34	1	2	189	907.2	222	1040.4	5476	2
24	2	LowCa	Con	Post_Meal	31	166.8	54.78	55.46	52.1	11.1	5853	46940	2633	1.19	1	1.5	1.329	0.9	1.2	32.23	63.36	1.78	3.51	1.14?	182	25	30	1530	313	5.63	55	3.8	2.45	1.01	0.73	45	70	90	0.71	573	34	1	2	189	907.2	222	1040.4	5476	2
24	2	LowCa	Con	Pre_Ex	31	166.8	54.78	55.46	52.1	11.1	5853	46940	2633	1.19	1	1.5	1.329	0.9	1.2	32.23	63.36	1.78	3.51	1.14?	182	25	30	1530	313	5.63	55	3.8	2.45	1.01	0.73	45	70	90	0.71	573	34	1	2	189	907.2	222	1040.4	5476	2
24	2	LowCa	Con	Ex	31	166.8	54.78	55.46	52.1	11.1	5853	46940	2633	1.19	1	1.5	1.329	0.9	1.2	32.23	63.36	1.78	3.51	1.14?	182	25	30	1530	313	5.63	55	3.8	2.45	1.01	0.73	45	70	90	0.71	573	34	1	2	189	907.2	222	1040.4	5476	3
24	2	LowCa	Con	Post_ex	31	166.8	54.78	55.46	52.1	11.1	5853	46940	2633	1.19	1	1.5	1.329	0.9	1.2	32.23	63.36	1.78	3.51	1.14?	182	25	30	1530	313	5.63	55	3.8	2.45	1.01	0.73	45	70	90	0.71	573	34	1	2	189	907.2	222	1040.4	5476	3
24	2	LowCa	Con	PostRE1	31	166.8	54.78	55.46	52.1	11.1	5853	46940	2633	1.19	1	1.5	1.329	0.9	1.2	32.23	63.36	1.78	3.51	1.14?	182	25	30	1530	313	5.63	55	3.8	2.45	1.01	0.73	45	70	90	0.71	573	34	1	2	189	907.2	222	1040.4	5476	3
24	2	LowCa	Con	PostRE2	31	166.8	54.78	55.46	52.1	11.1	5853	46940	2633	1.19	1	1.5	1.329	0.9	1.2	32.23	63.36	1.78	3.51	1.14?	182	25	30	1530	313	5.63	55	3.8	2.45	1.01	0.73	45	70	90	0.71	573	34	1	2	189	907.2	222	1040.4	5476	2
24	2	LowCa	Con	PostRE3	31	166.8	54.78	55.46	52.1	11.1	5853	46940	2633	1.19	1	1.5	1.329	0.9	1.2	32.23	63.36	1.78	3.51	1.14?	182	25	30	1530	313	5.63	55	3.8	2.45	1.01	0.73	45	70	90	0.71	573	34	1	2	189	907.2	222	1040.4	5476	2
25	1	LowCa	Con	Pre_trial	27	159	60.75	61.4	85.7	24	14050	44520	2252	1.08	0.2	0.4	1.162	-0.3	-0.2	26.88	53.57	1.65	3.29	1.15??	190	19	30	1170	263	4.28	61	3	2.51	0.87	0.9	51	77	90	0.97	85	1	3	5	156	748.8	191	863.4	4544	2
25	1	LowCa	Con	Post_Meal	27	159	60.75	61.4	85.7	24	14050	44520	2252	1.08	0.2	0.4	1.162	-0.3	-0.2	26.88	53.57	1.65	3.29	1.15??	190	19	30	1170	263	4.28	61	3	2.51	0.87	0.9	51	77	90	0.97	85	1	3	5	156	748.8	191	863.4	4544	1
25	1	LowCa	Con	Pre_Ex	27	159	60.75	61.4	85.7	24	14050	44520	2252	1.08	0.2	0.4	1.162	-0.3	-0.2	26.88	53.57	1.65	3.29	1.15??	190	19	30	1170	263	4.28	61	3	2.51	0.87	0.9	51	77	90	0.97	85	1	3	5	156	748.8	191	863.4	4544	1
25	1	LowCa	Con	Ex	27	159	60.75	61.4	85.7	24	14050	44520	2252	1.08	0.2	0.4	1.162	-0.3	-0.2	26.88	53.57	1.65	3.29	1.15??	190	19	30	1170	263	4.28	61	3	2.51	0.87	0.9	51	77	90	0.97	85	1	3	5	156	748.8	191	863.4	4544	1
25	1	LowCa	Con	Post_ex	27	159	60.75	61.4	85.7	24	14050	44520	2252	1.08	0.2	0.4	1.162	-0.3	-0.2	26.88	53.57	1.65	3.29	1.15??	190	19	30	1170	263	4.28	61	3	2.51	0.87	0.9	51	77	90	0.97	85	1	3	5	156	748.8	191	863.4	4544	1
25	1	LowCa	Con	PostRE1	27	159	60.75	61.4	85.7	24	14050	44520	2252	1.08	0.2	0.4	1.162	-0.3	-0.2	26.88	53.57	1.65	3.29	1.15??	190	19	30	1170	263	4.28	61	3	2.51	0.87	0.9	51	77	90	0.97	85	1	3	5	156	748.8	191	863.4	4544	1
25	1	LowCa	Con	PostRE2	27	159	60.75	61.4	85.7	24	14050	44520	2252	1.08	0.2	0.4	1.162	-0.3	-0.2	26.88	53.57	1.65	3.29	1.15??	190	19	30	1170	263	4.28	61	3	2.51	0.87	0.9	51	77	90	0.97	85	1	3	5	156	748.8	191	863.4	4544	2
25	1	LowCa	Con	PostRE3	27	159	60.75	61.4	85.7	24	14050	44520	2252	1.08	0.2	0.4	1.162	-0.3	-0.2	26.88	53.57	1.65	3.29	1.15??	190	19	30	1170	263	4.28	61	3	2.51	0.87	0.9	51	77	90	0.97	85	1	3	5	156	748.8	191	863.4	4544	3
25	2	Ca	CWI	Pre_trial	27	159	60.75	61.4	85.7	24	14050	44520	2252	1.08	0.2	0.4	1.162	-0.3	-0.2	26.88	53.57	1.65	3.29	1.15??	190	19	30	1170	263	4.28	61	3	2.51	0.87	0.9	51	77	90	0.97	85	1	3	5	164	787.2	197	905.4	4765	1
25	2	Ca	CWI	Post_Meal	27	159	60.75	61.4	85.7	24	14050	44520	2252	1.08	0.2	0.4	1.162	-0.3	-0.2	26.88	53.57	1.65	3.29	1.15??	190	19	30	1170	263	4.28	61	3	2.51	0.87	0.9	51	77	90	0.97	85	1	3	5	164	787.2	197	905.4	4765	3
25	2	Ca	CWI	Pre_Ex	27	159	60.75	61.4	85.7	24	14050	44520	2252	1.08	0.2	0.4	1.162	-0.3	-0.2	26.88	53.57	1.65	3.29	1.15??	190	19	30	1170	263	4.28	61	3	2.51	0.87	0.9	51	77	90	0.97	85	1	3	5	164	787.2	197	905.4	4765	2
25	2	Ca	CWI	Ex	27	159	60.75	61.4	85.7	24	14050	44520	2252	1.08	0.2	0.4	1.162	-0.3	-0.2	26.88	53.57	1.65	3.29	1.15??	190	19	30	1170	263	4.28	61	3	2.51	0.87	0.9	51	77	90	0.97	85	1	3	5	164	787.2	197	905.4	4765	2
25	2	Ca	CWI	Post_ex	27	159	60.75	61.4	85.7	24	14050	44520	2252	1.08	0.2	0.4	1.162	-0.3	-0.2	26.88	53.57	1.65	3.29	1.15??	190	19	30	1170	263	4.28	61	3	2.51	0.87	0.9	51	77	90	0.97	85	1	3	5	164	787.2	197	905.4	4765	1
25	2	Ca	CWI	PostRE1	27	159	60.75	61.4	85.7	24	14050	44520	2252	1.08	0.2	0.4	1.162	-0.3	-0.2	26.88	53.57	1.65	3.29	1.15??	190	19	30	1170	263	4.28	61	3	2.51	0.87	0.9	51	77	90	0.97	85	1	3	5	164	787.2	197	905.4	4765	1
25	2	Ca	CWI	PostRE2	27	159	60.75	61.4	85.7	24	14050	44520	2252	1.08	0.2	0.4	1.162	-0.3	-0.2	26.88	53.57	1.65	3.29	1.15??	190	19	30	1170	263	4.28	61	3	2.51	0.87	0.9	51	77	90	0.97	85	1	3	5	164	787.2	197	905.4	4765	2
25	2	Ca	CWI	PostRE3	27	159	60.75	61.4	85.7	24	14050	44520	2252	1.08	0.2	0.4	1.162	-0.3	-0.2	26.88	53.57	1.65	3.29	1.15??	190	19	30	1170	263	4.28	61	3	2.51	0.87	0.9	51	77	90	0.97	85	1	3	5	164	787.2	197	905.4	4765	1
26	1	LowCa	CWI	Pre_trial	20	168.2	55.58	56.57	65.6	15.7	8415	45191	2315	1.09	0.3	0.7	1.078	-1	-0.7	32.06	62.54	1.81	3.59	1.07	178	21	0	1260	275	4.86	82	3	2.46	1.02	0.82	49	65	90	0.93	85	1	3	5	165	792	233	931.8	4904	2
26	1	LowCa	CWI	Post_Meal	20	168.2	55.58	56.57	65.6	15.7	8415	45191	2315	1.09	0.3	0.7	1.078	-1	-0.7	32.06	62.54	1.81	3.59	1.07	178	21	0	1260	275	4.86	82	3	2.46	1.02	0.82	49	65	90	0.93	85	1	3	5	165	792	233	931.8	4904	2
26	1	LowCa	CWI	Pre_Ex	20	168.2	55.58	56.57	65.6	15.7	8415	45191	2315	1.09	0.3	0.7	1.078	-1	-0.7	32.06	62.54	1.81	3.59	1.07	178	21	0	1260	275	4.86	82	3	2.46	1.02	0.82	49	65	90	0.93	85	1	3	5	165	792	233	931.8	4904	2
26	1	LowCa	CWI	Ex	20	168.2	55.58	56.57	65.6	15.7	8415	45191	2315	1.09	0.3	0.7	1.078	-1	-0.7	32.06	62.54	1.81	3.59	1.07	178	21	0	1260	275	4.86	82	3	2.46	1.02	0.82	49	65	90	0.93	85	1	3	5	165	792	233	931.8	4904	3
26	1	LowCa	CWI	Post_ex	20	168.2	55.58	56.57	65.6	15.7	8415	45191	2315	1.09	0.3	0.7	1.078	-1	-0.7	32.06	62.54	1.81	3.59	1.07	178	21	0	1260	275	4.86	82	3	2.46	1.02	0.82	49	65	90	0.93	85	1	3	5	165	792	233	931.8	4904	3
26	1	LowCa	CWI	PostRE1	20	168.2	55.58	56.57	65.6	15.7	8415	45191	2315	1.09	0.3	0.7	1.078	-1	-0.7	32.06	62.54	1.81	3.59	1.07	178	21	0	1260	275	4.86	82	3	2.46	1.02	0.82	49	65	90	0.93	85	1	3	5	165	792	233	931.8	4904	2
26	1	LowCa	CWI	PostRE2	20	168.2	55.58	56.57	65.6	15.7	8415	45191	2315	1.09	0.3	0.7	1.078	-1	-0.7	32.06	62.54	1.81	3.59	1.07	178	21	0	1260	275	4.86	82	3	2.46	1.02	0.82	49	65	90	0.93	85	1	3	5	165	792	233	931.8	4904	1
26	1	LowCa	CWI	PostRE3	20	168.2	55.58	56.57	65.6	15.7	8415	45191	2315	1.09	0.3	0.7	1.078	-1	-0.7	32.06	62.54	1.81	3.59	1.07	178	21	0	1260	275	4.86	82	3	2.46	1.02	0.82	49	65	90	0.93	85	1	3	5	165	792	233	931.8	4904	3
26	2	Ca	Con	Pre_trial	20	168.2	55.58	56.57	65.6	15.7	8415	45191	2315	1.09	0.3	0.7	1.078	-1	-0.7	32.06	62.54	1.81	3.59	1.07	178	21	0	1260	275	4.86	82	3	2.46	1.02	0.82	49	65	90	0.93	85	1	3	5	165	792	242	937.2	4933	3
26	2	Ca	Con	Post_Meal	20	168.2	55.58	56.57	65.6	15.7	8415	45191	2315	1.09	0.3	0.7	1.078	-1	-0.7	32.06	62.54	1.81	3.59	1.07	178	21	0	1260	275	4.86	82	3	2.46	1.02	0.82	49	65	90	0.93	85	1	3	5	165	792	242	937.2	4933	3
26	2	Ca	Con	Pre_Ex	20	168.2	55.58	56.57	65.6	15.7	8415	45191	2315	1.09	0.3	0.7	1.078	-1	-0.7	32.06	62.54	1.81	3.59	1.07	178	21	0	1260	275	4.86	82	3	2.46	1.02	0.82	49	65	90	0.93	85	1	3	5	165	792	242	937.2	4933	3
26	2	Ca	Con	Ex	20	168.2	55.58	56.57	65.6	15.7	8415	45191	2315	1.09	0.3	0.7	1.078	-1	-0.7	32.06	62.54	1.81	3.59	1.07	178	21	0	1260	275	4.86	82	3	2.46	1.02	0.82	49	65	90	0.93	85	1	3	5	165	792	242	937.2	4933	2
26	2	Ca	Con	Post_ex	20	168.2	55.58	56.57	65.6	15.7	8415	45191	2315	1.09	0.3	0.7	1.078	-1	-0.7	32.06	62.54	1.81	3.59	1.07	178	21	0	1260	275	4.86	82	3	2.46	1.02	0.82	49	65	90	0.93	85	1	3	5	165	792	242	937.2	4933	3
26	2	Ca	Con	PostRE1	20	168.2	55.58	56.57	65.6	15.7	8415	45191	2315	1.09	0.3	0.7	1.078	-1	-0.7	32.06	62.54	1.81	3.59	1.07	178	21	0	1260	275	4.86	82	3	2.46	1.02	0.82	49	65	90	0.93	85	1	3	5	165	792	242	937.2	4933	2
26	2	Ca	Con	PostRE2	20	168.2	55.58	56.57	65.6	15.7	8415	45191	2315	1.09	0.3	0.7	1.078	-1	-0.7	32.06	62.54	1.81	3.59	1.07	178	21	0	1260	275	4.86	82	3	2.46	1.02	0.82	49	65	90	0.93	85	1	3	5	165	792	242	937.2	4933	2
26	2	Ca	Con	PostRE3	20	168.2	55.58	56.57	65.6	15.7	8415	45191	2315	1.09	0.3	0.7	1.078	-1	-0.7	32.06	62.54	1.81	3.59	1.07	178	21	0	1260	275	4.86	82	3	2.46	1.02	0.82	49	65	90	0.93	85	1	3	5	165	792	242	937.2	4933	2
27	1	Ca	Con	Pre_trial	23	170.7	64.8	65.01	67.3	20	12559	50173	2555	1.134	0.6	0.6	1.013	-1.5	-1.4	31.52	62.97	2.05	4.09	1.09	187	28	0	1680	333	5.13	69	1.1	2.57	1.33	0.93	75	72	90	5.22	113	1	2	4	200	960	304	1142.4	6013	1
27	1	Ca	Con	Post_Meal	23	170.7	64.8	65.01	67.3	20	12559	50173	2555	1.134	0.6	0.6	1.013	-1.5	-1.4	31.52	62.97	2.05	4.09	1.09	187	28	0	1680	333	5.13	69	1.1	2.57	1.33	0.93	75	72	90	5.22	113	1	2	4	200	960	304	1142.4	6013	1
27	1	Ca	Con	Pre_Ex	23	170.7	64.8	65.01	67.3	20	12559	50173	2555	1.134	0.6	0.6	1.013	-1.5	-1.4	31.52	62.97	2.05	4.09	1.09	187	28	0	1680	333	5.13	69	1.1	2.57	1.33	0.93	75	72	90	5.22	113	1	2	4	200	960	304	1142.4	6013	1
27	1	Ca	Con	Ex	23	170.7	64.8	65.01	67.3	20	12559	50173	2555	1.134	0.6	0.6	1.013	-1.5	-1.4	31.52	62.97	2.05	4.09	1.09	187	28	0	1680	333	5.13	69	1.1	2.57	1.33	0.93	75	72	90	5.22	113	1	2	4	200	960	304	1142.4	6013	1
27	1	Ca	Con	Post_ex	23	170.7	64.8	65.01	67.3	20	12559	50173	2555	1.134	0.6	0.6	1.013	-1.5	-1.4	31.52	62.97	2.05	4.09	1.09	187	28	0	1680	333	5.13	69	1.1	2.57	1.33	0.93	75	72	90	5.22	113	1	2	4	200	960	304	1142.4	6013	2
27	1	Ca	Con	PostRE1	23	170.7	64.8	65.01	67.3	20	12559	50173	2555	1.134	0.6	0.6	1.013	-1.5	-1.4	31.52	62.97	2.05	4.09	1.09	187	28	0	1680	333	5.13	69	1.1	2.57	1.33	0.93	75	72	90	5.22	113	1	2	4	200	960	304	1142.4	6013	1
27	1	Ca	Con	PostRE2	23	170.7	64.8	65.01	67.3	20	12559	50173	2555	1.134	0.6	0.6	1.013	-1.5	-1.4	31.52	62.97	2.05	4.09	1.09	187	28	0	1680	333	5.13	69	1.1	2.57	1.33	0.93	75	72	90	5.22	113	1	2	4	200	960	304	1142.4	6013	1
27	1	Ca	Con	PostRE3	23	170.7	64.8	65.01	67.3	20	12559	50173	2555	1.134	0.6	0.6	1.013	-1.5	-1.4	31.52	62.97	2.05	4.09	1.09	187	28	0	1680	333	5.13	69	1.1	2.57	1.33	0.93	75	72	90	5.22	113	1	2	4	200	960	304	1142.4	6013	1
27	2	LowCa	CWI	Pre_trial	23	170.7	64.8	65.01	67.3	20	12559	50173	2555	1.134	0.6	0.6	1.013	-1.5	-1.4	31.52	62.97	2.05	4.09	1.09	187	28	0	1680	333	5.13	69	1.1	2.57	1.33	0.93	75	72	90	5.22	113	1	2	4	200	960	288	1132.8	5962	1
27	2	LowCa	CWI	Post_Meal	23	170.7	64.8	65.01	67.3	20	12559	50173	2555	1.134	0.6	0.6	1.013	-1.5	-1.4	31.52	62.97	2.05	4.09	1.09	187	28	0	1680	333	5.13	69	1.1	2.57	1.33	0.93	75	72	90	5.22	113	1	2	4	200	960	288	1132.8	5962	1
27	2	LowCa	CWI	Pre_Ex	23	170.7	64.8	65.01	67.3	20	12559	50173	2555	1.134	0.6	0.6	1.013	-1.5	-1.4	31.52	62.97	2.05	4.09	1.09	187	28	0	1680	333	5.13	69	1.1	2.57	1.33	0.93	75	72	90	5.22	113	1	2	4	200	960	288	1132.8	5962	1
27	2	LowCa	CWI	Ex	23	170.7	64.8	65.01	67.3	20	12559	50173	2555	1.134	0.6	0.6	1.013	-1.5	-1.4	31.52	62.97	2.05	4.09	1.09	187	28	0	1680	333	5.13	69	1.1	2.57	1.33	0.93	75	72	90	5.22	113	1	2	4	200	960	288	1132.8	5962	1
27	2	LowCa	CWI	Post_ex	23	170.7	64.8	65.01	67.3	20	12559	50173	2555	1.134	0.6	0.6	1.013	-1.5	-1.4	31.52	62.97	2.05	4.09	1.09	187	28	0	1680	333	5.13	69	1.1	2.57	1.33	0.93	75	72	90	5.22	113	1	2	4	200	960	288	1132.8	5962	1
27	2	LowCa	CWI	PostRE1	23	170.7	64.8	65.01	67.3	20	12559	50173	2555	1.134	0.6	0.6	1.013	-1.5	-1.4	31.52	62.97	2.05	4.09	1.09	187	28	0	1680	333	5.13	69	1.1	2.57	1.33	0.93	75	72	90	5.22	113	1	2	4	200	960	288	1132.8	5962	1
27	2	LowCa	CWI	PostRE2	23	170.7	64.8	65.01	67.3	20	12559	50173	2555	1.134	0.6	0.6	1.013	-1.5	-1.4	31.52	62.97	2.05	4.09	1.09	187	28	0	1680	333	5.13	69	1.1	2.57	1.33	0.93	75	72	90	5.22	113	1	2	4	200	960	288	1132.8	5962	1
27	2	LowCa	CWI	PostRE3	23	170.7	64.8	65.01	67.3	20	12559	50173	2555	1.134	0.6	0.6	1.013	-1.5	-1.4	31.52	62.97	2.05	4.09	1.09	187	28	0	1680	333	5.13	69	1.1	2.57	1.33	0.93	75	72	90	5.22	113	1	2	4	200	960	288	1132.8	5962	1
28	1	Ca	CWI	Pre_trial	19	164	55.92	56.35	71.4	19	10187	43550	2522	1.217	1.2	1.6	1.187		0.1	30.5	60.57	1.72	3.42	1.07	203	19	0	1140	258	4.58	81	1.8	2.61	1.33	0.82	64	67	90	2.09	85	1	2	4	155	744	204	866.4	4560	1
28	1	Ca	CWI	Post_Meal	19	164	55.92	56.35	71.4	19	10187	43550	2522	1.217	1.2	1.6	1.187		0.1	30.5	60.57	1.72	3.42	1.07	203	19	0	1140	258	4.58	81	1.8	2.61	1.33	0.82	64	67	90	2.09	85	1	2	4	155	744	204	866.4	4560	2
28	1	Ca	CWI	Pre_Ex	19	164	55.92	56.35	71.4	19	10187	43550	2522	1.217	1.2	1.6	1.187		0.1	30.5	60.57	1.72	3.42	1.07	203	19	0	1140	258	4.58	81	1.8	2.61	1.33	0.82	64	67	90	2.09	85	1	2	4	155	744	204	866.4	4560	1
28	1	Ca	CWI	Ex	19	164	55.92	56.35	71.4	19	10187	43550	2522	1.217	1.2	1.6	1.187		0.1	30.5	60.57	1.72	3.42	1.07	203	19	0	1140	258	4.58	81	1.8	2.61	1.33	0.82	64	67	90	2.09	85	1	2	4	155	744	204	866.4	4560	1
28	1	Ca	CWI	Post_ex	19	164	55.92	56.35	71.4	19	10187	43550	2522	1.217	1.2	1.6	1.187		0.1	30.5	60.57	1.72	3.42	1.07	203	19	0	1140	258	4.58	81	1.8	2.61	1.33	0.82	64	67	90	2.09	85	1	2	4	155	744	204	866.4	4560	2
28	1	Ca	CWI	PostRE1	19	164	55.92	56.35	71.4	19	10187	43550	2522	1.217	1.2	1.6	1.187		0.1	30.5	60.57	1.72	3.42	1.07	203	19	0	1140	258	4.58	81	1.8	2.61	1.33	0.82	64	67	90	2.09	85	1	2	4	155	744	204	866.4	4560	1
28	1	Ca	CWI	PostRE2	19	164	55.92	56.35	71.4	19	10187	43550	2522	1.217	1.2	1.6	1.187		0.1	30.5	60.57	1.72	3.42	1.07	203	19	0	1140	258	4.58	81	1.8	2.61	1.33	0.82	64	67	90	2.09	85	1	2	4	155	744	204	866.4	4560	2
28	1	Ca	CWI	PostRE3	19	164	55.92	56.35	71.4	19	10187	43550	2522	1.217	1.2	1.6	1.187		0.1	30.5	60.57	1.72	3.42	1.07	203	19	0	1140	258	4.58	81	1.8	2.61	1.33	0.82	64	67	90	2.09	85	1	2	4	155	744	204	866.4	4560	1
28	2	LowCa	Con	Pre_trial	19	164	55.92	56.35	71.4	19	10187	43550	2522	1.217	1.2	1.6	1.187		0.1	30.5	60.57	1.72	3.42	1.07	203	19	0	1140	258	4.58	81	1.8	2.61	1.33	0.82	64	67	90	2.09	85	1	2	4	155	744	175	849	4468	1
28	2	LowCa	Con	Post_Meal	19	164	55.92	56.35	71.4	19	10187	43550	2522	1.217	1.2	1.6	1.187		0.1	30.5	60.57	1.72	3.42	1.07	203	19	0	1140	258	4.58	81	1.8	2.61	1.33	0.82	64	67	90	2.09	85	1	2	4	155	744	175	849	4468	1
28	2	LowCa	Con	Pre_Ex	19	164	55.92	56.35	71.4	19	10187	43550	2522	1.217	1.2	1.6	1.187		0.1	30.5	60.57	1.72	3.42	1.07	203	19	0	1140	258	4.58	81	1.8	2.61	1.33	0.82	64	67	90	2.09	85	1	2	4	155	744	175	849	4468	3
28	2	LowCa	Con	Ex	19	164	55.92	56.35	71.4	19	10187	43550	2522	1.217	1.2	1.6	1.187		0.1	30.5	60.57	1.72	3.42	1.07	203	19	0	1140	258	4.58	81	1.8	2.61	1.33	0.82	64	67	90	2.09	85	1	2	4	155	744	175	849	4468	4
28	2	LowCa	Con	Post_ex	19	164	55.92	56.35	71.4	19	10187	43550	2522	1.217	1.2	1.6	1.187		0.1	30.5	60.57	1.72	3.42	1.07	203	19	0	1140	258	4.58	81	1.8	2.61	1.33	0.82	64	67	90	2.09	85	1	2	4	155	744	175	849	4468	4
28	2	LowCa	Con	PostRE1	19	164	55.92	56.35	71.4	19	10187	43550	2522	1.217	1.2	1.6	1.187		0.1	30.5	60.57	1.72	3.42	1.07	203	19	0	1140	258	4.58	81	1.8	2.61	1.33	0.82	64	67	90	2.09	85	1	2	4	155	744	175	849	4468	4
28	2	LowCa	Con	PostRE2	19	164	55.92	56.35	71.4	19	10187	43550	2522	1.217	1.2	1.6	1.187		0.1	30.5	60.57	1.72	3.42	1.07	203	19	0	1140	258	4.58	81	1.8	2.61	1.33	0.82	64	67	90	2.09	85	1	2	4	155	744	175	849	4468	2
28	2	LowCa	Con	PostRE3	19	164	55.92	56.35	71.4	19	10187	43550	2522	1.217	1.2	1.6	1.187		0.1	30.5	60.57	1.72	3.42	1.07	203	19	0	1140	258	4.58	81	1.8	2.61	1.33	0.82	64	67	90	2.09	85	1	2	4	155	744	175	849	4468	2
29	1	LowCa	Con	Pre_trial	18	165.2	50.48	51.64	89.4	21.3	10303	38077	1994	0.961	-0.7	-0.1	0.971		-1.7	30.67	61.04	1.58	3.15	1.12	200	21	0	1260	275	5.33	137	2	2.55	0.91	0.8	58	64	90	1.03	85	1	3	5	164	787.2	192	902.4	4749	2
29	1	LowCa	Con	Post_Meal	18	165.2	50.48	51.64	89.4	21.3	10303	38077	1994	0.961	-0.7	-0.1	0.971		-1.7	30.67	61.04	1.58	3.15	1.12	200	21	0	1260	275	5.33	137	2	2.55	0.91	0.8	58	64	90	1.03	85	1	3	5	164	787.2	192	902.4	4749	3
29	1	LowCa	Con	Pre_Ex	18	165.2	50.48	51.64	89.4	21.3	10303	38077	1994	0.961	-0.7	-0.1	0.971		-1.7	30.67	61.04	1.58	3.15	1.12	200	21	0	1260	275	5.33	137	2	2.55	0.91	0.8	58	64	90	1.03	85	1	3	5	164	787.2	192	902.4	4749	2
29	1	LowCa	Con	Ex	18	165.2	50.48	51.64	89.4	21.3	10303	38077	1994	0.961	-0.7	-0.1	0.971		-1.7	30.67	61.04	1.58	3.15	1.12	200	21	0	1260	275	5.33	137	2	2.55	0.91	0.8	58	64	90	1.03	85	1	3	5	164	787.2	192	902.4	4749	2
29	1	LowCa	Con	Post_ex	18	165.2	50.48	51.64	89.4	21.3	10303	38077	1994	0.961	-0.7	-0.1	0.971		-1.7	30.67	61.04	1.58	3.15	1.12	200	21	0	1260	275	5.33	137	2	2.55	0.91	0.8	58	64	90	1.03	85	1	3	5	164	787.2	192	902.4	4749	3
29	1	LowCa	Con	PostRE1	18	165.2	50.48	51.64	89.4	21.3	10303	38077	1994	0.961	-0.7	-0.1	0.971		-1.7	30.67	61.04	1.58	3.15	1.12	200	21	0	1260	275	5.33	137	2	2.55	0.91	0.8	58	64	90	1.03	85	1	3	5	164	787.2	192	902.4	4749	3
29	1	LowCa	Con	PostRE2	18	165.2	50.48	51.64	89.4	21.3	10303	38077	1994	0.961	-0.7	-0.1	0.971		-1.7	30.67	61.04	1.58	3.15	1.12	200	21	0	1260	275	5.33	137	2	2.55	0.91	0.8	58	64	90	1.03	85	1	3	5	164	787.2	192	902.4	4749	2
29	1	LowCa	Con	PostRE3	18	165.2	50.48	51.64	89.4	21.3	10303	38077	1994	0.961	-0.7	-0.1	0.971		-1.7	30.67	61.04	1.58	3.15	1.12	200	21	0	1260	275	5.33	137	2	2.55	0.91	0.8	58	64	90	1.03	85	1	3	5	164	787.2	192	902.4	4749	2
29	2	Ca	CWI	Pre_trial	18	165.2	50.48	51.64	89.4	21.3	10303	38077	1994	0.961	-0.7	-0.1	0.971		-1.7	30.67	61.04	1.58	3.15	1.12	200	21	0	1260	275	5.33	137	2	2.55	0.91	0.8	58	64	90	1.03	85	1	3	5	165	792	207	916.2	4822	3
29	2	Ca	CWI	Post_Meal	18	165.2	50.48	51.64	89.4	21.3	10303	38077	1994	0.961	-0.7	-0.1	0.971		-1.7	30.67	61.04	1.58	3.15	1.12	200	21	0	1260	275	5.33	137	2	2.55	0.91	0.8	58	64	90	1.03	85	1	3	5	165	792	207	916.2	4822	3
29	2	Ca	CWI	Pre_Ex	18	165.2	50.48	51.64	89.4	21.3	10303	38077	1994	0.961	-0.7	-0.1	0.971		-1.7	30.67	61.04	1.58	3.15	1.12	200	21	0	1260	275	5.33	137	2	2.55	0.91	0.8	58	64	90	1.03	85	1	3	5	165	792	207	916.2	4822	2
29	2	Ca	CWI	Ex	18	165.2	50.48	51.64	89.4	21.3	10303	38077	1994	0.961	-0.7	-0.1	0.971		-1.7	30.67	61.04	1.58	3.15	1.12	200	21	0	1260	275	5.33	137	2	2.55	0.91	0.8	58	64	90	1.03	85	1	3	5	165	792	207	916.2	4822	3
29	2	Ca	CWI	Post_ex	18	165.2	50.48	51.64	89.4	21.3	10303	38077	1994	0.961	-0.7	-0.1	0.971		-1.7	30.67	61.04	1.58	3.15	1.12	200	21	0	1260	275	5.33	137	2	2.55	0.91	0.8	58	64	90	1.03	85	1	3	5	165	792	207	916.2	4822	3
29	2	Ca	CWI	PostRE1	18	165.2	50.48	51.64	89.4	21.3	10303	38077	1994	0.961	-0.7	-0.1	0.971		-1.7	30.67	61.04	1.58	3.15	1.12	200	21	0	1260	275	5.33	137	2	2.55	0.91	0.8	58	64	90	1.03	85	1	3	5	165	792	207	916.2	4822	3
29	2	Ca	CWI	PostRE2	18	165.2	50.48	51.64	89.4	21.3	10303	38077	1994	0.961	-0.7	-0.1	0.971		-1.7	30.67	61.04	1.58	3.15	1.12	200	21	0	1260	275	5.33	137	2	2.55	0.91	0.8	58	64	90	1.03	85	1	3	5	165	792	207	916.2	4822	2
29	2	Ca	CWI	PostRE3	18	165.2	50.48	51.64	89.4	21.3	10303	38077	1994	0.961	-0.7	-0.1	0.971		-1.7	30.67	61.04	1.58	3.15	1.12	200	21	0	1260	275	5.33	137	2	2.55	0.91	0.8	58	64	90	1.03	85	1	3	5	165	792	207	916.2	4822	2
30	1	LowCa	CWI	Pre_trial	22	162.1	62.72	63.26	76.4	22.3	13553	47090	2309	1.054	0	0.1	1.135	-0.5	-0.5	26.82	53.59	1.7	3.39	1	175	21	30	1290	279	4.41	56	5.2	2.55	1.34	0.87	84	71	90	1.89	136	1	2	1	168	806.4	243	952.2	5012	1
30	1	LowCa	CWI	Post_Meal	22	162.1	62.72	63.26	76.4	22.3	13553	47090	2309	1.054	0	0.1	1.135	-0.5	-0.5	26.82	53.59	1.7	3.39	1	175	21	30	1290	279	4.41	56	5.2	2.55	1.34	0.87	84	71	90	1.89	136	1	2	1	168	806.4	243	952.2	5012	3
30	1	LowCa	CWI	Pre_Ex	22	162.1	62.72	63.26	76.4	22.3	13553	47090	2309	1.054	0	0.1	1.135	-0.5	-0.5	26.82	53.59	1.7	3.39	1	175	21	30	1290	279	4.41	56	5.2	2.55	1.34	0.87	84	71	90	1.89	136	1	2	1	168	806.4	243	952.2	5012	4
30	1	LowCa	CWI	Ex	22	162.1	62.72	63.26	76.4	22.3	13553	47090	2309	1.054	0	0.1	1.135	-0.5	-0.5	26.82	53.59	1.7	3.39	1	175	21	30	1290	279	4.41	56	5.2	2.55	1.34	0.87	84	71	90	1.89	136	1	2	1	168	806.4	243	952.2	5012	3
30	1	LowCa	CWI	Post_ex	22	162.1	62.72	63.26	76.4	22.3	13553	47090	2309	1.054	0	0.1	1.135	-0.5	-0.5	26.82	53.59	1.7	3.39	1	175	21	30	1290	279	4.41	56	5.2	2.55	1.34	0.87	84	71	90	1.89	136	1	2	1	168	806.4	243	952.2	5012	4
30	1	LowCa	CWI	PostRE1	22	162.1	62.72	63.26	76.4	22.3	13553	47090	2309	1.054	0	0.1	1.135	-0.5	-0.5	26.82	53.59	1.7	3.39	1	175	21	30	1290	279	4.41	56	5.2	2.55	1.34	0.87	84	71	90	1.89	136	1	2	1	168	806.4	243	952.2	5012	2
30	1	LowCa	CWI	PostRE2	22	162.1	62.72	63.26	76.4	22.3	13553	47090	2309	1.054	0	0.1	1.135	-0.5	-0.5	26.82	53.59	1.7	3.39	1	175	21	30	1290	279	4.41	56	5.2	2.55	1.34	0.87	84	71	90	1.89	136	1	2	1	168	806.4	243	952.2	5012	1
30	1	LowCa	CWI	PostRE3	22	162.1	62.72	63.26	76.4	22.3	13553	47090	2309	1.054	0	0.1	1.135	-0.5	-0.5	26.82	53.59	1.7	3.39	1	175	21	30	1290	279	4.41	56	5.2	2.55	1.34	0.87	84	71	90	1.89	136	1	2	1	168	806.4	243	952.2	5012	1
30	2	Ca	Con	Pre_trial	22	162.1	62.72	63.26	76.4	22.3	13553	47090	2309	1.054	0	0.1	1.135	-0.5	-0.5	26.82	53.59	1.7	3.39	1	175	21	30	1290	279	4.41	56	5.2	2.55	1.34	0.87	84	71	90	1.89	136	1	2	1	168	806.4	248	955.2	5027	1
30	2	Ca	Con	Post_Meal	22	162.1	62.72	63.26	76.4	22.3	13553	47090	2309	1.054	0	0.1	1.135	-0.5	-0.5	26.82	53.59	1.7	3.39	1	175	21	30	1290	279	4.41	56	5.2	2.55	1.34	0.87	84	71	90	1.89	136	1	2	1	168	806.4	248	955.2	5027	2
30	2	Ca	Con	Pre_Ex	22	162.1	62.72	63.26	76.4	22.3	13553	47090	2309	1.054	0	0.1	1.135	-0.5	-0.5	26.82	53.59	1.7	3.39	1	175	21	30	1290	279	4.41	56	5.2	2.55	1.34	0.87	84	71	90	1.89	136	1	2	1	168	806.4	248	955.2	5027	1
30	2	Ca	Con	Ex	22	162.1	62.72	63.26	76.4	22.3	13553	47090	2309	1.054	0	0.1	1.135	-0.5	-0.5	26.82	53.59	1.7	3.39	1	175	21	30	1290	279	4.41	56	5.2	2.55	1.34	0.87	84	71	90	1.89	136	1	2	1	168	806.4	248	955.2	5027	1
30	2	Ca	Con	Post_ex	22	162.1	62.72	63.26	76.4	22.3	13553	47090	2309	1.054	0	0.1	1.135	-0.5	-0.5	26.82	53.59	1.7	3.39	1	175	21	30	1290	279	4.41	56	5.2	2.55	1.34	0.87	84	71	90	1.89	136	1	2	1	168	806.4	248	955.2	5027	4
30	2	Ca	Con	PostRE1	22	162.1	62.72	63.26	76.4	22.3	13553	47090	2309	1.054	0	0.1	1.135	-0.5	-0.5	26.82	53.59	1.7	3.39	1	175	21	30	1290	279	4.41	56	5.2	2.55	1.34	0.87	84	71	90	1.89	136	1	2	1	168	806.4	248	955.2	5027	3
30	2	Ca	Con	PostRE2	22	162.1	62.72	63.26	76.4	22.3	13553	47090	2309	1.054	0	0.1	1.135	-0.5	-0.5	26.82	53.59	1.7	3.39	1	175	21	30	1290	279	4.41	56	5.2	2.55	1.34	0.87	84	71	90	1.89	136	1	2	1	168	806.4	248	955.2	5027	2
30	2	Ca	Con	PostRE3	22	162.1	62.72	63.26	76.4	22.3	13553	47090	2309	1.054	0	0.1	1.135	-0.5	-0.5	26.82	53.59	1.7	3.39	1	175	21	30	1290	279	4.41	56	5.2	2.55	1.34	0.87	84	71	90	1.89	136	1	2	1	168	806.4	248	955.2	5027	2
31	1	Ca	Con	Pre_trial	21	166.9	52.88	53.73	100.1	25.9	13155	37572	2069	0.973	-0.6	-0.1	0.95	-1.9	-1.6	31.67	63.2	1.7	3.39	1.07	196	21	0	1260	275	5.12	88	2.9	2.41	1.22	0.83	52	63	90	1.16	85	2.5	3	5	164	787.2	224	921.6	4851	1
31	1	Ca	Con	Post_Meal	21	166.9	52.88	53.73	100.1	25.9	13155	37572	2069	0.973	-0.6	-0.1	0.95	-1.9	-1.6	31.67	63.2	1.7	3.39	1.07	196	21	0	1260	275	5.12	88	2.9	2.41	1.22	0.83	52	63	90	1.16	85	2.5	3	5	164	787.2	224	921.6	4851	1
31	1	Ca	Con	Pre_Ex	21	166.9	52.88	53.73	100.1	25.9	13155	37572	2069	0.973	-0.6	-0.1	0.95	-1.9	-1.6	31.67	63.2	1.7	3.39	1.07	196	21	0	1260	275	5.12	88	2.9	2.41	1.22	0.83	52	63	90	1.16	85	2.5	3	5	164	787.2	224	921.6	4851	2
31	1	Ca	Con	Ex	21	166.9	52.88	53.73	100.1	25.9	13155	37572	2069	0.973	-0.6	-0.1	0.95	-1.9	-1.6	31.67	63.2	1.7	3.39	1.07	196	21	0	1260	275	5.12	88	2.9	2.41	1.22	0.83	52	63	90	1.16	85	2.5	3	5	164	787.2	224	921.6	4851	2
31	1	Ca	Con	Post_ex	21	166.9	52.88	53.73	100.1	25.9	13155	37572	2069	0.973	-0.6	-0.1	0.95	-1.9	-1.6	31.67	63.2	1.7	3.39	1.07	196	21	0	1260	275	5.12	88	2.9	2.41	1.22	0.83	52	63	90	1.16	85	2.5	3	5	164	787.2	224	921.6	4851	4
31	1	Ca	Con	PostRE1	21	166.9	52.88	53.73	100.1	25.9	13155	37572	2069	0.973	-0.6	-0.1	0.95	-1.9	-1.6	31.67	63.2	1.7	3.39	1.07	196	21	0	1260	275	5.12	88	2.9	2.41	1.22	0.83	52	63	90	1.16	85	2.5	3	5	164	787.2	224	921.6	4851	2
31	1	Ca	Con	PostRE2	21	166.9	52.88	53.73	100.1	25.9	13155	37572	2069	0.973	-0.6	-0.1	0.95	-1.9	-1.6	31.67	63.2	1.7	3.39	1.07	196	21	0	1260	275	5.12	88	2.9	2.41	1.22	0.83	52	63	90	1.16	85	2.5	3	5	164	787.2	224	921.6	4851	1
31	1	Ca	Con	PostRE3	21	166.9	52.88	53.73	100.1	25.9	13155	37572	2069	0.973	-0.6	-0.1	0.95	-1.9	-1.6	31.67	63.2	1.7	3.39	1.07	196	21	0	1260	275	5.12	88	2.9	2.41	1.22	0.83	52	63	90	1.16	85	2.5	3	5	164	787.2	224	921.6	4851	1
31	2	LowCa	CWI	Pre_trial	21	166.9	52.88	53.73	100.1	25.9	13155	37572	2069	0.973	-0.6	-0.1	0.95	-1.9	-1.6	31.67	63.2	1.7	3.39	1.07	196	21	0	1260	275	5.12	88	2.9	2.41	1.22	0.83	52	63	90	1.16	85	2.5	3	5	164	787.2	193	903	4753	1
31	2	LowCa	CWI	Post_Meal	21	166.9	52.88	53.73	100.1	25.9	13155	37572	2069	0.973	-0.6	-0.1	0.95	-1.9	-1.6	31.67	63.2	1.7	3.39	1.07	196	21	0	1260	275	5.12	88	2.9	2.41	1.22	0.83	52	63	90	1.16	85	2.5	3	5	164	787.2	193	903	4753	2
31	2	LowCa	CWI	Pre_Ex	21	166.9	52.88	53.73	100.1	25.9	13155	37572	2069	0.973	-0.6	-0.1	0.95	-1.9	-1.6	31.67	63.2	1.7	3.39	1.07	196	21	0	1260	275	5.12	88	2.9	2.41	1.22	0.83	52	63	90	1.16	85	2.5	3	5	164	787.2	193	903	4753	2
31	2	LowCa	CWI	Ex	21	166.9	52.88	53.73	100.1	25.9	13155	37572	2069	0.973	-0.6	-0.1	0.95	-1.9	-1.6	31.67	63.2	1.7	3.39	1.07	196	21	0	1260	275	5.12	88	2.9	2.41	1.22	0.83	52	63	90	1.16	85	2.5	3	5	164	787.2	193	903	4753	3
31	2	LowCa	CWI	Post_ex	21	166.9	52.88	53.73	100.1	25.9	13155	37572	2069	0.973	-0.6	-0.1	0.95	-1.9	-1.6	31.67	63.2	1.7	3.39	1.07	196	21	0	1260	275	5.12	88	2.9	2.41	1.22	0.83	52	63	90	1.16	85	2.5	3	5	164	787.2	193	903	4753	4
31	2	LowCa	CWI	PostRE1	21	166.9	52.88	53.73	100.1	25.9	13155	37572	2069	0.973	-0.6	-0.1	0.95	-1.9	-1.6	31.67	63.2	1.7	3.39	1.07	196	21	0	1260	275	5.12	88	2.9	2.41	1.22	0.83	52	63	90	1.16	85	2.5	3	5	164	787.2	193	903	4753	2
31	2	LowCa	CWI	PostRE2	21	166.9	52.88	53.73	100.1	25.9	13155	37572	2069	0.973	-0.6	-0.1	0.95	-1.9	-1.6	31.67	63.2	1.7	3.39	1.07	196	21	0	1260	275	5.12	88	2.9	2.41	1.22	0.83	52	63	90	1.16	85	2.5	3	5	164	787.2	193	903	4753	1
31	2	LowCa	CWI	PostRE3	21	166.9	52.88	53.73	100.1	25.9	13155	37572	2069	0.973	-0.6	-0.1	0.95	-1.9	-1.6	31.67	63.2	1.7	3.39	1.07	196	21	0	1260	275	5.12	88	2.9	2.41	1.22	0.83	52	63	90	1.16	85	2.5	3	5	164	787.2	193	903	4753	1
32	1	Ca	CWI	Pre_trial	27	181.8	67.44	68.59	70.4	20.1	13018	51836	2801	1.084	0.2	0.2	1.168	-0.3	-0.4	26.92	53.38	1.85	3.66	1.08	184	25	30	1530	313	4.56	94	2.3	2.44	0.9	0.86	42	66	90	1.65	231	1	4	5	188	902.4	289	1075.8	5662	5
32	1	Ca	CWI	Post_Meal	27	181.8	67.44	68.59	70.4	20.1	13018	51836	2801	1.084	0.2	0.2	1.168	-0.3	-0.4	26.92	53.38	1.85	3.66	1.08	184	25	30	1530	313	4.56	94	2.3	2.44	0.9	0.86	42	66	90	1.65	231	1	4	5	188	902.4	289	1075.8	5662	3
32	1	Ca	CWI	Pre_Ex	27	181.8	67.44	68.59	70.4	20.1	13018	51836	2801	1.084	0.2	0.2	1.168	-0.3	-0.4	26.92	53.38	1.85	3.66	1.08	184	25	30	1530	313	4.56	94	2.3	2.44	0.9	0.86	42	66	90	1.65	231	1	4	5	188	902.4	289	1075.8	5662	5
32	1	Ca	CWI	Ex	27	181.8	67.44	68.59	70.4	20.1	13018	51836	2801	1.084	0.2	0.2	1.168	-0.3	-0.4	26.92	53.38	1.85	3.66	1.08	184	25	30	1530	313	4.56	94	2.3	2.44	0.9	0.86	42	66	90	1.65	231	1	4	5	188	902.4	289	1075.8	5662	4
32	1	Ca	CWI	Post_ex	27	181.8	67.44	68.59	70.4	20.1	13018	51836	2801	1.084	0.2	0.2	1.168	-0.3	-0.4	26.92	53.38	1.85	3.66	1.08	184	25	30	1530	313	4.56	94	2.3	2.44	0.9	0.86	42	66	90	1.65	231	1	4	5	188	902.4	289	1075.8	5662	4
32	1	Ca	CWI	PostRE1	27	181.8	67.44	68.59	70.4	20.1	13018	51836	2801	1.084	0.2	0.2	1.168	-0.3	-0.4	26.92	53.38	1.85	3.66	1.08	184	25	30	1530	313	4.56	94	2.3	2.44	0.9	0.86	42	66	90	1.65	231	1	4	5	188	902.4	289	1075.8	5662	5
32	1	Ca	CWI	PostRE2	27	181.8	67.44	68.59	70.4	20.1	13018	51836	2801	1.084	0.2	0.2	1.168	-0.3	-0.4	26.92	53.38	1.85	3.66	1.08	184	25	30	1530	313	4.56	94	2.3	2.44	0.9	0.86	42	66	90	1.65	231	1	4	5	188	902.4	289	1075.8	5662	3
32	1	Ca	CWI	PostRE3	27	181.8	67.44	68.59	70.4	20.1	13018	51836	2801	1.084	0.2	0.2	1.168	-0.3	-0.4	26.92	53.38	1.85	3.66	1.08	184	25	30	1530	313	4.56	94	2.3	2.44	0.9	0.86	42	66	90	1.65	231	1	4	5	188	902.4	289	1075.8	5662	2
32	2	LowCa	Con	Pre_trial	27	181.8	67.44	68.59	70.4	20.1	13018	51836	2801	1.084	0.2	0.2	1.168	-0.3	-0.4	26.92	53.38	1.85	3.66	1.08	184	25	30	1530	313	4.56	94	2.3	2.44	0.9	0.86	42	66	90	1.65	231	1	4	5	188	902.4	277	1068.6	5624	4
32	2	LowCa	Con	Post_Meal	27	181.8	67.44	68.59	70.4	20.1	13018	51836	2801	1.084	0.2	0.2	1.168	-0.3	-0.4	26.92	53.38	1.85	3.66	1.08	184	25	30	1530	313	4.56	94	2.3	2.44	0.9	0.86	42	66	90	1.65	231	1	4	5	188	902.4	277	1068.6	5624	3
32	2	LowCa	Con	Pre_Ex	27	181.8	67.44	68.59	70.4	20.1	13018	51836	2801	1.084	0.2	0.2	1.168	-0.3	-0.4	26.92	53.38	1.85	3.66	1.08	184	25	30	1530	313	4.56	94	2.3	2.44	0.9	0.86	42	66	90	1.65	231	1	4	5	188	902.4	277	1068.6	5624	3
32	2	LowCa	Con	Ex	27	181.8	67.44	68.59	70.4	20.1	13018	51836	2801	1.084	0.2	0.2	1.168	-0.3	-0.4	26.92	53.38	1.85	3.66	1.08	184	25	30	1530	313	4.56	94	2.3	2.44	0.9	0.86	42	66	90	1.65	231	1	4	5	188	902.4	277	1068.6	5624	3
32	2	LowCa	Con	Post_ex	27	181.8	67.44	68.59	70.4	20.1	13018	51836	2801	1.084	0.2	0.2	1.168	-0.3	-0.4	26.92	53.38	1.85	3.66	1.08	184	25	30	1530	313	4.56	94	2.3	2.44	0.9	0.86	42	66	90	1.65	231	1	4	5	188	902.4	277	1068.6	5624	4
32	2	LowCa	Con	PostRE1	27	181.8	67.44	68.59	70.4	20.1	13018	51836	2801	1.084	0.2	0.2	1.168	-0.3	-0.4	26.92	53.38	1.85	3.66	1.08	184	25	30	1530	313	4.56	94	2.3	2.44	0.9	0.86	42	66	90	1.65	231	1	4	5	188	902.4	277	1068.6	5624	3
32	2	LowCa	Con	PostRE2	27	181.8	67.44	68.59	70.4	20.1	13018	51836	2801	1.084	0.2	0.2	1.168	-0.3	-0.4	26.92	53.38	1.85	3.66	1.08	184	25	30	1530	313	4.56	94	2.3	2.44	0.9	0.86	42	66	90	1.65	231	1	4	5	188	902.4	277	1068.6	5624	2
32	2	LowCa	Con	PostRE3	27	181.8	67.44	68.59	70.4	20.1	13018	51836	2801	1.084	0.2	0.2	1.168	-0.3	-0.4	26.92	53.38	1.85	3.66	1.08	184	25	30	1530	313	4.56	94	2.3	2.44	0.9	0.86	42	66	90	1.65	231	1	4	5	188	902.4	277	1068.6	5624	2
[truncated: 90 more columns]
